1 **Title**

2 Location-Specific Facilitation in Marmoset Auditory Cortex

3

4 **Authors**

5 Chenggang Chen<sup>+</sup>, Sheng Xu<sup>+</sup>, Yunyan Wang, and Xiaoqin Wang\*

6

7 **Affiliations**

8 Laboratory of Auditory Neurophysiology, Department of Biomedical Engineering, Johns

9 Hopkins University School of Medicine, Baltimore, Maryland 21205, USA.

10

11 <sup>+</sup> Co-first author

12

13 **Contact information**

14 \*Correspondence to: [xiaoqin.wang@jhu.edu](mailto:xiaoqin.wang@jhu.edu)

15

## 1 **Abstract**

2 Responses of auditory cortex neurons are modulated by spectral or temporal  
3 context, but much less is known about modulation by spatial context. Here, we  
4 investigated single neuron responses to sequences of sounds either repeatedly delivered  
5 from a single spatial location or randomly delivered from multiple spatial locations in the  
6 auditory cortex of awake marmosets. Instead of inducing adaptation as expected from  
7 well-documented stimulus-specific adaptation studies, repetitive stimulation from a target  
8 speaker evoked long-lasting, location-specific facilitation (LSF) in many neurons,  
9 irrespective of the visibility of the target speaker. The extent of LSF decreased with  
10 decreasing presentation probability of the target speaker. Intracellular recordings showed  
11 that repetitive sound stimulation evoked sustained membrane potential depolarization  
12 which gave rise to firing rate facilitation. Computational models suggest two distinct  
13 neural mechanisms underlying LSF. Our findings revealed a novel form of contextual  
14 modulation in the auditory cortex that may play a role in auditory stream segregation.

15

## 16 **Main**

17 It has been well established that responses of neurons in auditory cortex are  
18 influenced by stimulus context. Contextual effects could be suppressive or facilitatory. For  
19 example, the presence of a preceding masker sound could suppress a neuron's  
20 responses to a succeeding probe sound (Calford and Semple, 1995; Wehr and Zador,  
21 2005; Scholes et al., 2011; Phillips et al., 2017). Preceding stimuli can also facilitate a  
22 neuron's responses to succeeding stimuli in auditory cortex under particular conditions  
23 (Brosch et al., 1999; Brosch and Schreiner, 2000; Bartlett and Wang, 2005). Contextual  
24 modulations can occur in spectral domain (Suga et al., 1979; Sutter and Schreiner, 1991;  
25 Nelken et al., 1994; Feng and Wang, 2017), temporal or spectrotemporal domain (O'Neill  
26 and Suga, 1979; Kilgard and Merzenich, 2002; Brosch and Scheich, 2008; Sadagopan  
27 and Wang, 2009; Asari and Zador, 2009).

28 In addition to spectral and temporal context, spatial context can also modulate sound  
29 processing in auditory cortex. For example, responses of neurons in macaque auditory  
30 cortex elicited by a stimulus with 0° interaural phase disparity (IPD) may be altered by  
31 preceding stimuli with 90° or -90° IPD (Malone et al. 2002). Responses of neurons to a  
32 probe sound from one spatial location could be suppressed by masker sounds from other  
33 locations (Fitzpatrick et al., 1999; Reale and Brugge, 2000; Mickey and Middlebrooks,  
34 2005). In a study of awake marmoset primary auditory cortex (A1) and adjacent caudal  
35 field, it was found that a masker placed far away from a neuron's spatial receptive field  
36 (SRF) can suppress the response elicited by a probe sound in its SRF, suggesting  
37 widespread contextual modulations in the spatial domain (Zhou and Wang, 2012, 2014).  
38 However, comparing to spectral and temporal contextual effects, much less is known on  
39 spatial contextual effects in auditory cortex.

40 An important property of auditory cortex neurons is that they exhibit stimulus-specific  
41 adaptation (SSA) to the stimuli that are presented with a high probability (Nelken, 2014).  
42 SSA has attracted much interest in the past two decades (Malmierca and Auksztulewicz,

1 2021) because it was thought to be a potential neuronal correlate of mismatch negativity  
2 (MMN) (Ulanovsky et al., 2003; Fishman and Steinschneider, 2012), which has been  
3 extensively studied in humans (Näätänen et al., 2007) and is believed to reflect deviance  
4 detection (Polterovich et al., 2018; Pérez-González et al., 2021) and predictive coding  
5 (Parras et al., 2017; Carbajal and Malmierca, 2018), etc. SSA has been studied mostly in  
6 spectral (Nelken et al., 2013; Natan et al., 2015; Harpaz et al., 2021) and temporal  
7 (Awwad et al., 2020) domains. It is not clear to what extent SSA exists in the spatial  
8 domain.

9 In this study, we explored how spatial contextual modulations evolve by stimulating  
10 neurons in the awake marmoset auditory cortex with sequences of sounds either  
11 randomly from various spatial locations (equal-probability mode) or repeatedly from a  
12 single location (continuous mode). To our surprise, instead of inducing adaptation as  
13 expected from well-documented SSA literature, repetitive stimulation in the high  
14 probability mode from spatial locations away from the center of a neuron's SRF evoked  
15 lasting facilitation observed by extracellular recordings from single neurons in the  
16 auditory cortex. Nearly half of the sampled neuronal population exhibited this spatial  
17 facilitation, irrespective of the stimuli type and visibility of the test speaker. The extent of  
18 the facilitation decreased with decreasing presentation probability of the test speaker.  
19 Intracellular recordings showed that repetitive sound stimulation evoked sustained  
20 membrane potential depolarization that was followed by firing rate facilitation. We used  
21 computational models to explore neural mechanisms underlying neural facilitation. Taken  
22 together, our findings revealed location-specific facilitation (LSF) to repetitively presented  
23 sound stimuli in auditory cortex that has not been observed. This form of spatial  
24 contextual modulation may play a role in such functions as detecting the regularity,  
25 segregating the sound stream, and solving the cocktail party problem.

26

## 27 **Results**

28

### 29 **Repetitive sound stimulation evoked neural facilitation**

30 We evaluated how extracellularly recorded individual neurons in the auditory cortex  
31 responded to broadband sounds played from different speaker locations. Fifteen equally  
32 spaced speakers were placed on a semi-spherical surface centered around the animal's  
33 head and above the horizontal plane (Fig. 1a, b). In each test session, we first probed a  
34 neuron's spatial selectivity by delivering a frozen wideband noise stimulus from each  
35 speaker location in a randomly shuffled order. We will refer to this stimulation mode as  
36 the *equal-probability presentation mode* for which all locations have the same occurrence  
37 probability of 1/15. Spatial receptive field (SRF) was constructed for each neuron using  
38 the averaged firing rate of the responses to wideband noises in the equal-probability  
39 presentation mode. Fig. 1c, d show the responses of an example neuron obtained in the  
40 equal-probability presentation mode. This neuron had an SRF centered around speaker  
41 #7 (Fig. 1c) and responded to this location with sustained firing throughout the stimulus  
42 duration, and to other locations with onset or transient firing (Fig. 1d). Fig. 2a shows firing  
43 rate versus speak number for the equal-probability presentation mode. Speaker #7

1 evoked the highest firing rate (38.5 spikes/sec) in this neuron, followed by speaker #8  
2 (10.5 spikes/sec). Speakers #14, #13, #9 and #11 evoked near zero firing rate, and a  
3 negative firing rate was observed for speakers #2, #4, and #5. Because the firing rate for  
4 each speaker location is calculated by subtracting the spontaneous firing rate from the  
5 total firing rate, a negative firing rate indicates inhibition.

6 After the characterization of a neuron's SRF, we further tested each neuron with the  
7 *continuous presentation mode* in which stimuli were delivered from a speaker location  
8 repeatedly, with each trial separated by an inter-stimulus interval of fixed or variable  
9 length (range: 500 to 5200 ms, see below). Fig. 2b, c show the responses of the same  
10 neuron depicted in Fig. 1c, d and Fig. 2a to 300 presentations of a 200 ms frozen  
11 wideband noise stimulus delivered from speaker #14 in the continuous presentation  
12 mode. Speaker #14 evoked 0.8 spikes/sec firing rate in the equal presentation mode  
13 (Fig. 2a, blue dot) which was considered as the baseline firing rate of this speaker  
14 location. In contrast to the expectation from previous auditory cortex literature on  
15 adaptation, the response of this neuron to the repeated presentations of a wideband  
16 noise stimulus from the same speaker #14 showed epochs consisting of consecutive  
17 trials with substantially higher firing rates than the baseline firing rate (median: 16  
18 spikes/sec, Fig. 2c, red dots). Elevated firing rates could be observed in trials long after  
19 the first trial (e.g., between 150th and 250th trials). Also note that during the trials with  
20 elevated firing rates (Fig. 2b, red dots), the firing patterns were sustained throughout the  
21 stimulus duration. To further examine the facilitated response in the continuous  
22 presentation mode, we measured the "facilitation phase" to characterize trials with firing  
23 rates exceeding the facilitation threshold which was defined as one standard deviation  
24 above the baseline firing rate (Fig. 2a, c, orange bar). This neuron exhibited several  
25 facilitation phases lasting up to 42 trials (Fig. 2c, red dots). Fig. 2d-f show responses of  
26 another example neuron. In the equal-probability presentation mode, this neuron had  
27 weak responses to marmoset vocalization stimuli at speaker #8 (Fig. 2d, blue dot, 0.05  
28 spikes/sec). When tested in the continuous presentation mode with speaker #8 (Fig. 2e,  
29 f), this neuron had weak responses initially, but the responses gradually built up and  
30 eventually led to a facilitation phase (median: 4.8 spikes/sec) lasting 20 trials (Fig. 2f, red  
31 dots).

### 32 **Neural facilitation occurred in a variety of stimulus conditions**

34 We tested a total of 104 auditory cortex neurons in four hemispheres of three  
35 marmosets using wideband stimuli including frozen wideband noises, amplitude-  
36 modulated wideband noises, and marmoset vocalizations. 725 sessions were tested by  
37 both equal-probability and continuous presentation modes. Population statistics of the  
38 facilitation phase are shown in Extended Data Fig. 1a which shows that a facilitation  
39 phase could persist as long as 45 trials. For further analyses, we focused on the sessions  
40 that exhibited facilitation phases lasting at least 5 consecutive trials (129 sessions from  
41 51 neurons). In the majority of sessions, 200 trials were tested (Extended Data Fig. 1b).  
42 In most sessions, it took fewer than 100 trials to achieve the first facilitation phase lasting  
43 at least 5 consecutive trials (median: 44 trials) (Extended Data Fig. 1c).

44 We calculated the proportion of facilitation trials in the continuous presentation mode

1 for the 129 sessions from 51 neurons that exhibited facilitation phases lasting at least 5  
2 consecutive trials which ranged between 15%-87.5% (median: 32.8%) (Fig. 3a, orange  
3 line). As a control, we also calculated the proportion of facilitation trials in the equal-  
4 probability presentation mode for the same group of 51 neurons (Fig. 3a, blue line) which  
5 was significantly smaller than that of the continuous presentation mode (14.3% vs.  
6 32.8%,  $p < 0.0001$ , rank-sum test). The group of 51 neurons scattered across all  
7 recorded cortical areas and did not show any clustering patterns (Extended Data Fig. 2a-  
8 d). Most of the neurons (43/51) were recorded at superficial cortical depths ( $< 1$  mm,  
9 Extended Data Fig. 2e, f). We attempted to distinguish putative excitatory and inhibitory  
10 neurons by their spike waveform (broad or narrow; Extended Data Fig. 3a) (Mitchell et  
11 al., 2007). Spike waveform of 32 neurons had been recorded and 29 neurons had a  
12 signal-to-noise ratio higher than 20 dB (Extended Data Fig. 3b). 23 neurons were  
13 classified as putative excitatory neurons (yielded 58 sessions) and 6 neurons as putative  
14 inhibitory neurons (yielded 12 sessions) (Extended Data Fig. 3c). The proportions of  
15 facilitation trials were similar between putative inhibitory and excitatory neurons  
16 (Extended Data Fig. 3d; 34% vs. 32%,  $p = 0.2271$ , rank-sum test). This analysis suggests  
17 that the facilitation can be induced in both putative excitatory and inhibitory neurons.

18 We conducted control tests to see if the observed facilitation depended on visual  
19 inputs. We found that the facilitation was not limited to speakers located within a  
20 marmoset's visual field ( $< 90$  degrees) (Chaplin et al., 2012) and could be induced from  
21 speaker locations both in front and behind an animal (Extended Data Fig. 4a-c). Across  
22 all 129 test sessions, the proportions of facilitation trials were similar between front (64  
23 sessions) and back (65 sessions) speaker locations (Fig. 3b; 38% vs. 35%,  $p = 0.4653$ ,  
24 rank-sum test). The facilitation could still be observed when an animal was tested in the  
25 darkness (7 sessions) (Extended Data Fig. 4d-f). Interestingly, the proportion of  
26 facilitation trials was significantly higher in the darkness than in the light-on condition (122  
27 sessions) (Extended Data Fig. 4g; 57% vs. 32%,  $p < 0.0001$ , rank-sum test). These  
28 results suggest that visual inputs are not required to induce the facilitation. We also  
29 tested the effects of different stimulus types. Neural facilitation was also observed using  
30 unfrozen wideband noises (Extended Data Fig. 4h). Comparing to frozen wideband  
31 noises (83 sessions), slightly larger proportion of facilitation trials was observed using  
32 complex stimuli including amplitude-modulated frozen wideband noises (37 sessions) or  
33 marmoset vocalizations (9 sessions) as stimuli (Fig. 3c; 30% vs. 41%,  $p = 0.0054$ , rank-  
34 sum test).

35 Neural facilitation was observed at both short inter-stimulus intervals (ISI) (700 ms,  
36 Fig. 2b) and long ISI (1900 ms, Fig. 2e). In addition to ISI with a fixed length, we also  
37 tested random ISIs in a subset of sessions. An example is shown in Extended Data Fig.  
38 5a. This neuron not only showed facilitation at three constant ISIs but also at random  
39 ISIs. Across all 129 test sessions, three groups of ISIs were tested: short (500 ms and  
40 700 ms, 78 sessions), long ( $>1000$  ms, 36 sessions) and random (700 ms to 2200 ms, 15  
41 sessions). The proportion of facilitation trials was similar between the three ISI groups  
42 (Extended Data Fig. 5b; 35%, 41%, and 34%,  $p = 0.1244$ , one-way ANOVA).

43

44 **Neural facilitation did not alter a neuron's SRF**

1 Previous studies in both auditory and visual cortices found that after presenting a  
2 stimulus repeatedly, neurons typically exhibited a decrease of response to the stimulus  
3 but an increase of response to other stimuli that are sufficiently different from the  
4 repeated stimulus (Condon and Weinberger, 1991; Dragoi et al., 2000), which suggests  
5 changes in a neuron's receptive field. To investigate whether neural facilitation altered a  
6 neuron's SRF, we compared the SRF measured before and after testing a neuron in the  
7 continuous presentation mode. An example neuron is shown in Extended Data Fig. 6a  
8 (same neuron in Fig. 1c). After presenting 300 trials of wideband noise at the same  
9 location continuously (spike raster shown in Fig. 2b), the SRF (Extended Data Fig. 6a,  
10 bottom) appeared similar to the SRF measured before (Extended Data Fig. 6a, top).  
11 More examples of pre and post SRFs are shown in Extended Data Fig. 6b. To  
12 quantitatively characterize SRF changes, we calculated three metrics in 61 neurons in  
13 which pre and post SRFs were measured: tuning selectivity, direction selectivity, and  
14 correlation coefficient. The average tuning selectivity (Extended Data Fig. 6c, left, 0.153  
15 vs. 0.146) and direction selectivity (Extended Data Fig. 6c, right, 0.477 vs. 0.473)  
16 remained similar after tested by the continuous presentation mode. To further quantify the  
17 tuning similarity, we computed the pairwise correlation coefficient between each pair of  
18 responses to fifteen speaker locations (Extended Data Fig. 6d, left). 75% (197/262) of  
19 pair of sessions had a correlation coefficient greater than 0.7 (Extended Data Fig. 6d,  
20 right). We also examined if firing rate changed after a neuron was tested by the  
21 continuous presentation mode for the highest (1st) and lowest (15th) ranked target  
22 speakers (Extended Data Fig. 6e). Both speaker ranks showed similar firing rates before  
23 and after being tested by the continuous presentation mode (ranked 1st: 13.8 vs. 13.0  
24 spikes/sec; ranked 15th: 2.9 vs. 2.6 spikes/sec), consistent with the observations on SRF  
25 stability (Extended Data Fig. 6a-d). These analyses show that the repetitive presentation  
26 of stimuli from the same speaker location does not significantly alter the SRF of the  
27 neuron being tested.

28 In the 129 sessions that exhibited facilitation phases lasting for at least 5  
29 consecutive trials when tested by the continuous presentation mode, the average firing  
30 rate during the facilitation phases was nearly three times greater than that evoked by the  
31 same speaker location under the equal-probability presentation mode (Extended Data  
32 Fig. 6f, orange box: 17.5 vs. 6.6 spikes/sec,  $p < 0.0001$ , one-way ANOVA). The  
33 spontaneous firing rates during equal-probability presentation mode, non-facilitation and  
34 facilitation phases of the continuous presentation mode were similar (Extended Data Fig.  
35 6f, blue box: 5.1, 5.2, and 6.2 spikes/sec,  $p = 0.3924$ , one-way ANOVA). Thus, the  
36 facilitation phases during the continuous presentation mode were not accompanied by  
37 significant changes in spontaneous activities.

38

### 39 **Neural facilitation depends on sound locations**

40 Neural facilitation was observed at all tested speaker locations. To investigate the  
41 effect of speaker location on the facilitation, each speaker was assigned a rank number  
42 based on its baseline firing rate obtained under the equal-probability presentation mode.  
43 Speaker ranked 1st had the highest firing rate among all tested speakers and was at or  
44 near the center of a neuron's SRF. The lowest ranked speaker usually fell far outside of



1 the SRF and evoked a response not significantly different from the spontaneous activity.  
2 The speaker rank of an example neuron is shown in Fig. 3d. We found that speakers with  
3 lower ranks usually elicited more facilitation phases than speakers with higher ranks  
4 when tested under the continuous presentation mode as shown by the example neuron  
5 in Fig. 3e, orange dots. Note that in this neuron no facilitation was induced by the frontal  
6 speaker (speaker #1, rank 5th) and only one facilitation trial (out of 200 trials) was  
7 induced by the speaker at the contralateral 90° location (speaker #6, rank 4th). These  
8 two locations were commonly used in previous SSA studies (see Discussion). When the  
9 test speaker was ranked 15th, 18 of 77 (23.4%) tested sessions had facilitation phases  
10 lasting for at least 5 consecutive trials (Extended Data Fig. 7a) and the average  
11 proportion of facilitation trials was 21.6% (Fig. 3f, orange dots). In comparison, when the  
12 test speaker was ranked 1st, these statistics dropped to 10.5% (4/38 tested sessions,  
13 Extended Data Fig. 7a) and 7.3% (Fig. 3f, orange dots), respectively.

14 In addition to the facilitation, suppressed responses were also observed in the  
15 continuous presentation mode. We measured the “adaptation phase” to characterize  
16 trials with firing rates lower than the adaptation threshold which was defined as one  
17 standard deviation below the baseline firing rate (Fig. 3d, blue bar). At higher ranked  
18 speakers, more adaptation phases were observed than at lower ranked speakers as  
19 shown by an example neuron in Fig. 3e, blue dots. Note that 70% of trials (140/200)  
20 exhibited adaptation at the frontal speaker (speaker #1, rank 5th) and 52.5% of trials  
21 (105/200) showed adaptation at the contralateral 90° location (speaker #6, rank 4th). The  
22 average proportion of adaptation trails across all tested sessions was 26.1% when the  
23 test speaker was ranked 1st, whereas that number dropped to 8.9% when the test  
24 speaker was ranked 15th (Fig. 3f, blue dots). This trend was the opposite of facilitation  
25 (Fig. 3f, orange dots).

26

## 27 **Neural facilitation primarily depends on sound location but not firing** 28 **rate**

29 We showed above that neural facilitation depends on speaker rank, which was  
30 determined by firing rate in the equal-probability presentation mode at a neuron's  
31 preferred sound level. Sound level was a crucial parameter to influence the firing rate of  
32 auditory cortex neurons (Sadagopan and Wang, 2008; Wang, 2018). This gives us the  
33 opportunity to determine whether the neural facilitation primarily depends on sound  
34 location or any type of stimuli that could influence the firing rate, including speaker  
35 location and sound level. Therefore, we measured a neuron's responses to wideband  
36 noise delivered from fifteen speaker locations at four sound levels under the equal-  
37 probability presentation mode in a subset of neurons. An example of this analysis is  
38 shown in Fig. 4a. We assigned this neuron a speaker rank and sound level rank. In  
39 contrast to previous figures where the speaker rank was determined by firing rate at one  
40 sound level (mostly the best sound level), the speaker rank in this analysis was  
41 determined by the averaged firing rate (Fig. 4a, black dots) at four sound levels (Fig. 4a,  
42 four different color dots). The sound level rank at each speaker location was also  
43 determined by the firing rate in which the 1st ranked sound level had the highest firing  
44 rate among the four tested sound levels. If the neural facilitation was location-dependent,

1 then the facilitation shall increase from higher ranked speakers to lower ranked speakers,  
2 but not from higher ranked sound levels to lower ranked sound levels. If the neural  
3 facilitation was firing rate-dependent, then the facilitation shall increase from higher  
4 ranked speakers to lower ranked speakers as well as from higher ranked sound levels to  
5 lower ranked sound levels.

6 We performed the speaker rank and sound level rank analysis in 390 sessions  
7 obtained from 63 neurons. At each sound level rank, the proportion of facilitation trials  
8 tended to be larger at the lower ranked speakers (Fig. 4b, fifteen same color dots in x-  
9 axis). When averaged across sound levels, the proportion of facilitation trials was only  
10 3.4% at the speaker ranked 1st (21 sessions tested) whereas the proportion jumped to  
11 19.1% when the test speaker was ranked 15th (41 sessions tested) (Fig. 4b, slope of  
12 northeast arrow; Extended Data Fig. 7b, orange dots). In contrast, at each speaker rank,  
13 the proportion of facilitation trials did not vary much when the sound level rank changed  
14 (Fig. 4b, four different color dots in y-axis). When averaged across speakers, the  
15 proportion of facilitation trials was 12.4% at the sound level ranked 1st (119 sessions  
16 tested) whereas the proportion rose slightly to 13.4% when the sound level was ranked  
17 4th (61 sessions tested) (Fig. 4b, length of upwards arrow; Extended Data Fig. 7c,  
18 orange dots).

19 Compared to neural facilitation, the proportion of adaptation trials tended to be larger  
20 at both higher ranked speakers (Fig. 4c, fifteen same color dots in x-axis) and higher  
21 ranked sound levels (Fig. 4c, four different color dots in the y-axis). When averaged  
22 across sound levels, the proportion of adaptation trials was 18.0% at the speaker ranked  
23 1st and the proportion dropped to 8.9% when the test speaker was ranked 15th (Fig. 4c,  
24 slope of southeast arrow; Extended Data Fig. 7b, blue dots). When averaged across  
25 speakers, the proportion of adaptation trials was 18.5% at the sound level ranked 1st and  
26 the proportion dropped to 12.3% when the sound level was ranked 4th (Fig. 4c, length of  
27 downwards arrow; Extended Data Fig. 7c, blue dots).

28 These results suggest that neural facilitation is primarily dependent on sound  
29 location, but not firing rate. In contrast, neural adaptation is primarily dependent on firing  
30 rate which is expected from previous adaptation literature.

31

### 32 **Dependence of neural facilitation on location continuity**

33 As we have shown above, neural facilitation can be induced in the continuous  
34 presentation mode in which the probability of stimuli delivered from a target speaker is  
35 100% (none from other speakers). In the equal-probability presentation mode, the  
36 presentation probability for each speaker is equal to  $1/15$  (number of speakers).  
37 Therefore, the continuous presentation mode provides the location continuity for sound  
38 delivery, whereas the equal-probability presentation mode does not. We further  
39 investigated in a subset of units whether the sound location continuity was necessary to  
40 induce neural facilitation by changing the presentation probability of the target speaker  
41 from 100% to 75%, 50%, 25% and 6.7% (Fig. 5a, target speaker: orange square; other  
42 speakers: blue color shapes). An example neuron is shown in Fig. 5b. The decrease of  
43 the target speaker's presentation probability to 75%, 50%, and 25% resulted in  
44 increasingly weaker responses of the target speaker (100%: 20, 75%: 20, 50%: 10, and



1 25%: 6 spikes/sec). Across all 57 test sessions in 12 neurons, the decrease of the  
2 presentation probability of the target speaker from 100% to 75%, 50%, 25% and 6.7%  
3 resulted in weaker response of the target speaker (6.81, 3.43, 1.93, 1.89 and 0.88  
4 spikes/sec, Fig. 5c) and the reduction of the proportion of facilitation trials (44%, 23%,  
5 16%, 21% and 14%, Fig. 5d). The proportion of facilitation trials lasting for at least 5  
6 consecutive trials showed a similar trend of decrease (Fig. 5e, 25%, 12%, 5%, and 0%).

7 Previous stimulus-specific adaptation (SSA) related studies found that neurons in the  
8 auditory cortex of anesthetized rats were sensitive to statistical regularities: standard and  
9 deviant tones in random sequences both evoked larger responses than the same tones  
10 in periodic sequences (Yaron et al., 2012; Parras et al. 2017). To investigate whether  
11 neural facilitation is also sensitive to the static regularity of the target speaker, we  
12 played two different types of sequences with 50% probability of the target speaker. In one  
13 sequence, stimuli from the target speaker and other speakers were randomly arranged,  
14 similar to the 75%, 25%, and 6.7% probability mode (Fig. 5a, 50). In the other sequence,  
15 stimuli from the target speaker were interleaved with stimuli from other speakers, so that  
16 the stimuli from the target speaker were periodical (Fig. 5a, 50/p). In contrast to SSA, we  
17 found that the periodic target speaker sequence evoked significantly stronger responses  
18 than the random target speaker sequence (Fig. 5c, 3.91 vs. 1.93 spikes/sec,  $p = 0.0443$ ,  
19 rank-sum test). The proportions of facilitation trials were similar between random and  
20 periodic target speaker sequence with 50% probability. (Fig. 5d-e).

## 21 22 **Repetitive sound stimulation induced sustained membrane potential** 23 **depolarization**

24 We next asked what are cellular mechanisms underlying the neural facilitation  
25 evoked by repetitive stimuli. In a subset of experiments, we performed intracellular  
26 recordings in awake marmoset (Gao et al. 2016; Gao and Wang, 2019) to examine both  
27 membrane potential and spiking activity during both equal-probability presentation and  
28 continuous presentation modes. Fig. 6a shows membrane potential traces of an example  
29 neuron. Fig. 6b shows the speaker rank based on firing rate obtained under the equal-  
30 probability presentation mode in this neuron. Our previous analyses of the spiking activity  
31 measured the “facilitation phase” to characterize trials with firing rates exceeding the  
32 facilitation threshold which was defined as one standard deviation above the baseline  
33 firing rate (Fig. 2a, 2d, 3d, and 6b, orange bar). Here, we measured the “depolarization  
34 phase” to characterize trials with membrane potential exceeding the depolarization  
35 threshold which was defined as one standard deviation above the baseline membrane  
36 potential (Fig. 6c, blue bar). The membrane potential steadily increased after 40 trials  
37 during the continuous presentation (Fig. 6d, blue line) which was accompanied by an  
38 increase in spiking activity (Fig. 6d, orange line).

39 We conducted 30 sessions under the continuous presentation mode in 14  
40 intracellularly recorded neurons at different speaker locations. The target speakers were  
41 divided into a low ranked group (10th to 15th) and a high ranked group (1st to 6th). For  
42 the low ranked group, we observed a larger proportion of depolarization trials than  
43 hyperpolarization trials (Fig. 6e, gold dots, 43% vs. 19%,  $p = 0.1810$ , rank-sum test). In  
44 contrast, the opposite trend was observed for the high ranked group (Fig. 6e, violet dots,

1 7% vs. 50%,  $p = 0.0044$ , rank-sum test). Thus, both the firing rate facilitation and  
2 membrane potential depolarization were influenced by the speaker rank. We further  
3 calculated the membrane potential variation of each trial. Trials were classified into  
4 depolarization, hyperpolarization, or transition groups based on whether they passed the  
5 depolarization threshold, hyperpolarization threshold, or neither. Depolarization trials had  
6 the lowest variation and hyperpolarization trials had the highest variation (Fig. 6f, 1.07 vs.  
7 2.97,  $p < 0.0001$ , one-way ANOVA).

8 For each session, we compared the difference between the number of trials needed to  
9 achieve the first membrane potential depolarization phase and the spiking facilitation  
10 phase that lasted for at least 5 consecutive trials. We found that the depolarization of  
11 membrane potential always preceded the facilitation of spiking activity (Fig. 6g, median: 9  
12 trials). Fig. 6h shows changes in membrane potential magnitude after depolarization  
13 (seven sessions). The resting membrane potential was -69 mV. After 30 trials, membrane  
14 potential achieved a stable level of -62 mV which was 7 mV depolarized. We will use  
15 these three parameters in our computational models below.

16

## 17 **Computational models suggest two distinct neural mechanisms** 18 **underlying location-specific facilitation**

19 Our in vivo extracellular and intracellular recording data showed that both spiking  
20 and subthreshold activity of a neuron could be modulated (facilitation or adaptation of  
21 spiking activity and sustained depolarization or hyperpolarization of membrane potential)  
22 by repetitive stimuli in a location-specific way. We used two computational models to  
23 investigate potential neural mechanisms underlying these observations. In our models,  
24 synaptic inputs were panoramic (i.e., with inputs from every spatial location) based on  
25 observations from previous whole-cell recording studies in rats. Chadderton et al. (2009)  
26 found excitatory postsynaptic potential (EPSP) could be evoked from all spatial locations  
27 in all tested neurons. Kyweriga et al. (2014) found excitatory and inhibitory currents could  
28 be evoked by all interaural level difference (ILD) cues. Panoramic inputs make it possible  
29 for a cortical neuron to generate neural facilitation or sustained depolarization by  
30 amplifying weak responses at unpreferred sound locations.

31 A conceptual model for location-specific facilitation and adaptation in spiking activity  
32 is shown in Extended Data Fig. 8a. In this model, a neuron receives panoramic excitatory  
33 and inhibitory inputs but with varying strengths according to the speaker ranking as  
34 revealed by the equal probability presentation mode (upper plot). When stimuli are  
35 repetitively presented at the 15<sup>th</sup>-ranked speaker (right plot), stronger inhibitory inputs to  
36 the model neuron would result in larger depression than the depression of weaker  
37 excitatory inputs (Extended Data Fig. 8c). The overall stronger excitation than inhibition  
38 would evoke neural facilitation at this speaker location (Extended Data Fig. 8e). When  
39 stimuli are repetitively presented at the 1<sup>st</sup>-ranked speaker (left plot), stronger excitatory  
40 inputs to the model neuron would result in a larger depression than the depression of  
41 weaker inhibitory inputs. Then the overall stronger inhibition than excitation would evoke  
42 neural adaptation at this speaker location. We call this neuron model “EI-LIF model” in  
43 which excitatory and inhibitory inputs are differentially depressed (Fig. 7a).

44 A second conceptual model is shown in Extended Data Fig. 8b for membrane

1 potential. This model is based on the idea that the brain state is modulated when stimuli  
2 switch from equal-probability presentation mode to continuous presentation mode (see  
3 Discussion). Since neural activity of the network is homeostatically regulated (Pacheco et  
4 al. 2019), sustained depolarization of weaker responses (red line) at the 15<sup>th</sup> ranked  
5 speaker will be accompanied by sustained hyperpolarization of stronger responses (blue  
6 line) at the 1<sup>st</sup>-ranked speaker. A sustained depolarization makes it easier to reach the  
7 threshold thus evoke neural facilitation (Extended Data Fig. 8d, e). In contrast, a  
8 sustained hyperpolarization makes it harder to reach the threshold thus evokes neural  
9 adaptation. We call this neuron model “MP-LIF model”.

10 Fig. 7b, c, f, g show the neural facilitation simulated with the EI-LIF model (up) and  
11 MP-LIF model (down) in the continuous presentation mode. Notice the elevated firing  
12 rates were observed in tens of trials after the start of continuous sound stimuli (Fig. 7b, f,  
13 red dots) and epochs consisting of consecutive trials with higher firing rates than the  
14 facilitation threshold (Fig. 7c, g, red lines). We also simulated neural adaptation in the EI-  
15 LIF model (Extended Data Fig. 8f) and MP-LIF model (Extended Data Fig. 8g). The  
16 threshold of neural facilitation and adaptation were calculated in the equal-probability  
17 presentation mode (gray area). Notice the sparse spikes (Extended Data Fig. 8f, g, blue  
18 dots) and epochs consisting of consecutive trials with firing rates lower than the  
19 adaptation threshold (Extended Data Fig. 8f, g, blue line).

20 We further examined whether our models could also simulate the speaker  
21 probability-dependent neural facilitation observed in Fig. 5. We hypothesized that the  
22 recovery time of excitatory and inhibitory synaptic release and amplitude of sustained  
23 membrane potential depolarization were proportional to the probability of the target  
24 speaker (Fig. 7a, e). We found that decreasing the target speaker’s presentation  
25 probability reduced the proportion of facilitation trials in the EI-LIF model (Fig. 7d, gold  
26 dots) and MP-LIF model (Fig. 7h, gold dots). Two models’ performances were close to  
27 the experimental results observed in Fig. 5d (now shown as Fig. 7d, h, green dots). We  
28 further compared the proportion of facilitation trials in our models with 129 experimentally  
29 tested sessions in the continuous and equal-probability presentation mode shown in Fig.  
30 3a (now shown as Fig. 7d, h, red dots). The results were also similar at 100% and 6.7%  
31 probabilities (EI-LIF: 39% vs 36% and 18% vs 14%; MP-LIF: 41% vs 36% and 18% vs  
32 14%). In summary, both EI-LIF and MP-LIF models recapitulated the neural facilitation  
33 and adaptation observed in our experiments and suggest potential underlying neural  
34 mechanisms. Future experimental studies can provide validations of these suggested  
35 mechanisms.

36

## 37 Discussion

38

39 In this study, we investigated extracellular and intracellular neural responses to  
40 repetitive sound stimulation in the auditory cortex of awake marmoset monkeys. The  
41 major finding of this study is the observation of a novel location-specific facilitation (LSF)  
42 which is dependent on sound location and stimulus presentation mode. LSF raises  
43 questions on the conventional definition of the spatial receptive field as being a static

1 property of a auditory cortical neuron. LSF is a different phenomenon than the well-  
2 studied stimulus-specific adaptation (SSA). Computational models based on the synaptic  
3 depression or sustained depolarization mechanisms can both reproduce the LSF. The  
4 dependence of facilitation on location continuity and regularity suggests that LSF is a  
5 potential single-neuron substrate of auditory streaming.

## 6 **Implications for the spatial receptive field (SRF) of cortical neurons**

7 The concept of a stable spatial receptive field (SRF) has been a cornerstone of our  
8 understanding of spatial tuning in the central auditory system. Auditory cortex neurons in  
9 anesthetized animals exhibit predominantly broad SRFs that typically increase in size (or  
10 width) as sound level increases (Middlebrooks and Pettigrew 1981; Mrcic-Flogel et al.  
11 2005). In contrast, studies in awake animals have reported restricted SRFs which do not  
12 increase or show less increase in size as sound level increases (Mickey and  
13 Middlebrooks 2003; Woods et al. 2006; Zhou and Wang, 2012; Remington and Wang,  
14 2019). It has been shown that behavior engagement could further decrease the size of  
15 SRFs and therefore sharpen spatial tuning of cortical neurons (Lee and Middlebrooks,  
16 2011; van der Heijden et al., 2018). The finding of the present study further showed that  
17 the spatial tuning of auditory cortex neurons in awake marmosets is not static in that a  
18 non-preferred spatial location could become responsive under particular conditions. This  
19 suggests that cortical neurons can respond to spatial locations away from the center of  
20 SRF dynamically. When stimuli from other locations were inserted into the repetitively  
21 presented sound sequence from one location, neural facilitation was interrupted and  
22 even diminished (Fig. 5). However, neurons still preserve their original SRF after being  
23 presented with repetitive sound stimuli (Extended Data Fig. 6). In contrast, after a  
24 repetitive pure tone stimulus was presented, a neuron changes its spectral receptive field  
25 by reducing responses to the specific tone frequency (Condon and Weinberger, 1991). A  
26 non-static SRF could play a role in spatial and binaural tuning plasticity that are observed  
27 in monaural deprived animals (Popescu and Polley, 2010; Keating et al., 2015).

## 29 **Comparison with stimulus-specific adaptation (SSA)**

30 Adaptation to repetitive sound stimulation (i.e., a reduction in response to a high-  
31 probability stimulus) by auditory neurons is a commonly observed phenomenon and has  
32 been referred to as stimulus-specific adaptation (SSA) (Harpaz et al., 2021; Malmierca et  
33 al., 2014; Nelken, 2014). In previous studies that demonstrated SSA, both close field and  
34 free field sound stimulation paradigms were used in anesthetized or awake animals. In  
35 close field stimulation, the sound was delivered through a sealed speaker into the  
36 contralateral ear (Condon and Weinberger, 1991; Yaron et al., 2012; Hershenhoren et al.,  
37 2014; Nieto-Diego and Malmierca, 2016) or preferred ear (Ulanovsky et al., 2004). In free  
38 field stimulation, the sound was played from the location contralateral to (Chen et al.,  
39 2015; Kato et al., 2015; Natan et al., 2017), in front of (Natan et al., 2015) or above  
40 (Farley et al., 2010) an animal. Adaptation to repetitive sound stimulation was also  
41 observed in the current study, in particular when stimuli were delivered from preferred  
42 sound locations (i.e., higher ranked speaker locations at or near the center of SRF) (Fig.  
43 3e, f) or sound levels (i.e., higher ranked sound levels) (Fig. 4c). However, when sound  
44

1 was delivered from locations away from the center of SRF, our study revealed neural  
2 facilitation to repetitive sound stimulation in the auditory cortex of awake marmosets. To  
3 the best of our knowledge, no previous studies have systematically tested repetitive  
4 sound stimulation across spatial locations.

5 The most striking difference between the current study and previous SSA studies is  
6 the observation of facilitation instead of adaptation to repetitive stimulation in the auditory  
7 cortex. Although the predominant response in auditory system to high probability stimuli  
8 is adaptation, unadapted and even facilitated responses have been observed in a few  
9 previous studies. Thomas et al. (2012) found that repetitive stimulation did not elicit  
10 adaptation in specialized (FM-selective) neurons of bat inferior colliculus (IC). They  
11 argued that because in echolocating bats behaviorally relevant sounds are echoes from  
12 objects, adaptation to those repetitive echolocation signals that occur with a high  
13 probability would be maladaptive during active echolocation. Parras et al. (2017) showed  
14 that most neurons on the ascending auditory pathway (IC, auditory thalamus, auditory  
15 cortex) of anesthetized rats exhibited repetition suppression. However, repetition  
16 enhancement was observed in all three areas. Lesicko et al. 2022 and Kommajosyula et  
17 al. 2021 also found repetition enhancement in the IC and auditory thalamus of awake  
18 rodents, respectively. This is consistent with our findings that periodic target speaker  
19 sequences evoked stronger responses than random target speaker sequences (Fig. 5c).

20 Together, our finding of neural facilitation to the repetitive sound stimulation provides  
21 a complementary contextual modulation effect to the SSA and a new perspective on our  
22 current understanding of cortical responses to repetitive stimuli.

23

## 24 **Neural mechanisms underlying LSF**

25 We investigated the neural mechanisms underlying LSF with two approaches.  
26 Experimentally, we directly recorded the membrane potential from neurons that exhibited  
27 LSF in awake marmosets (Fig. 6). Computationally, we built a leaky integrate-and-fire  
28 (LIF) neuron model and manipulated its excitatory-inhibitory synaptic depression  
29 amplitude and recovery time (EI-LIF model) and membrane potential depolarization or  
30 hyperpolarization amplitude (MP-LIF model). Both models reproduced LSF and  
31 recapitulated the key properties of LSF (Fig. 7).

32 Two mechanisms may account for the LSF observed in this study. One is repetitive  
33 stimulus-evoked synaptic depression. Although excitatory and inhibitory synapses are  
34 both depressed by repetitive stimuli (Galarreta and Hestrin, 1998), inhibitory synapses  
35 may show a larger amplitude of depression than excitatory synapses (Heiss et al., 2008).  
36 The imbalance between excitation and inhibition may produce LSF. Two lines of evidence  
37 support this hypothesis. First, the subthreshold activity could be evoked from all tested  
38 sound locations (Chadderton et al., 2009) and strong sound-evoked inhibition is  
39 commonly observed outside of the SRF (Zhou and Wang, 2014; Remington and Wang  
40 2019). Therefore, the panoramic and strong inhibitory inputs are more susceptible to  
41 depression than excitatory inputs. Second, compared to the excitatory inputs, the  
42 inhibitory inputs are more sensitive to context change (Kuchibhotla et al., 2016) and show  
43 stronger depression during the forward masking (Wehr and Zador, 2005), suggesting the  
44 inhibitory inputs are more adjustable than excitatory inputs. Our EI-LIF model could



1 reproduce the LSF based on the hypothesis that neuron has a stronger depression of  
2 their inhibitory inputs than excitatory inputs, thereby supporting a synaptic depression  
3 mechanism.

4 Another mechanism is salient stimulus-evoked membrane potential depolarization. A  
5 salient auditory spectrotemporal feature could attract attention automatically (Kayser et  
6 al., 2005; Huang and Elhilali, 2020). A wideband noise used in this study was not salient  
7 when it was presented randomly from different locations to characterize SRF. However, a  
8 wideband noise could become salient when it was repetitively presented from one  
9 location while sounds at all other locations disappeared. This auditory spatial pop-out  
10 hypothesis is similar to visual saliency where a visual item in sharp contrast with its  
11 neighboring items in a simple feature, such as color or orientation, automatically captures  
12 attention (Yan et al., 2018). If a location-specific wideband noise is salient, a more salient  
13 sound feature at the spectrotemporal domain, e.g., amplitude-modulated wideband noise  
14 and vocalization, indeed evoke a larger proportion of facilitation trials than the less salient  
15 unmodulated wideband noise (Fig. 3c). In humans, salient auditory stimuli dilate the pupil  
16 (Wang et al., 2014). Pupil dilation is closely correlated with membrane potential  
17 depolarization and a decrease in membrane potential variation (McGinley et al., 2015).  
18 Interestingly, we observed similar changes in membrane potential when neurons exhibit  
19 LSF (Fig. 6), suggesting that the ongoing repetitive stimuli are salient to the animals.  
20 Importantly, our MP-LIF model reproduced LSF by incorporating parameters obtained  
21 from intracellular recordings. Together, our intracellular recording data and MP-LIF model  
22 simulation support a salient stimulus-evoked sustained depolarization mechanism  
23 underlying the LSF.

24 It is not clear whether top-down attention plays a role in LSF. It has been shown that  
25 task engagement could modulate the SRFs (Lee and Middlebrooks, 2011). In the current  
26 study, marmosets passively listened to sound stimuli, though they might have chosen to  
27 pay attention to repeated stimulation from a particular location in the continuous  
28 stimulation mode. However, we did not observe an increase in spontaneous activity when  
29 neural facilitation was observed (Extended Data Fig. 6f), whereas attention tends to  
30 increase spontaneous activity (Luck et al., 1997; Reynolds et al., 2000). Furthermore, we  
31 found no preference of different cell types in exhibiting the LSF (Extended Data Fig. 3d),  
32 whereas top-down attention has stronger modulation over putative inhibitory neurons  
33 (Mitchell et al., 2007).

34

### 35 **Candidate neural substrate for auditory streaming**

36 In a natural environment like at a cocktail party, sounds are often simultaneously and  
37 continuously generated by multiple sound sources (Cherry, 1953). One major challenge  
38 for a listener is forming auditory streaming (McDermott, 2009). Streaming requires  
39 acoustic cues such as frequency, temporal regularity, and sound location (Shamma and  
40 Micheyl, 2010). Over the past decade, a rapidly increasing number of studies have  
41 investigated the effect of temporal regularity or repetition for streaming (Bendixen et al.,  
42 2010; Andreou et al., 2011). Regular stimulation induces stronger responses than  
43 random stimulation when measured with magneto-electro encephalography (M/EEG) and  
44 functional MRI (fMRI) in humans (Barascuda et al., 2016; Southwell et al., 2017). The



1 findings that repetitive sound stimulation evoked LSF and regular stimulation evoked a  
2 stronger response than random stimulation provide a candidate single-neuron correlate  
3 of this perceptual phenomenon. Computational modeling suggests that the change of  
4 synaptic efficacy could result in sustained responses to regular stimulation  
5 (Auksztulewicz et al., 2017). Interestingly, changing the excitatory and inhibitory synaptic  
6 efficacy in our EI-LIF model also generated the LSF. Those two models further suggest  
7 that sustained response to regular stimulation and LSF share a similar neural  
8 mechanism. Repetition causes the target to pop out from the background and is robust to  
9 inattention (McDermott et al., 2011; Masutomi et al., 2015). Based on the same pop-out  
10 hypothesis, our MP-LIF model could reproduce the LSF. Those similarities suggest that  
11 our EI-LIF and MP-LIF models provide a theoretical foundation for both LSF observed in  
12 marmosets and enhanced response to regular over random stimulation observed in  
13 humans. Together, our findings and models provide valuable new insights into the neural  
14 mechanisms of auditory streaming.

15

## 16 **Methods**

17 **Animal preparation and experimental setup.** Data were collected from five  
18 hemispheres of four monkeys (Monkey 1: left, Monkey 2: left and right, Monkey 3: right,  
19 Monkey 4: left). All experimental procedures were approved by the Johns Hopkins  
20 University Animal Use and Care Committee. These procedures were identical to those  
21 described in previous publications from our laboratory (Lu et al. 2001). A typical recording  
22 session lasted 3-4 h, during which an animal sat quietly in a specially adapted primate  
23 chair with its head immobilized. Throughout the entire recording session, the animal was  
24 closely monitored via a video camera by the researcher. The eye position was not  
25 controlled, but when the animal closed its eyes for a prolonged period, the experimenter  
26 ensured the animal opened its eyes before the next stimulus set was presented.

27 Experiments were conducted in double-walled sound-proof chamber (Industrial-  
28 Acoustics) with the internal walls and ceiling lined with three-inch acoustic absorption  
29 foam (Sonex). Fifteen free-field loudspeakers were placed on a semi-spherical surface  
30 centered around the animal's head and above the horizontal plane. Speaker setup was  
31 similar to our previous studies (Zhou and Wang, 2012), but with speakers covered the  
32 rear sphere. Eight speakers were evenly positioned at 0° elevation, five speakers were  
33 evenly spaced at +45° elevation in the frontal hemifield, one speaker was located at +45°  
34 elevation in the rear midline and one speaker located directly above the animal.

35

36 **Extracellular and intracellular recordings.** Extracellular recording procedures were  
37 identical to those described in our previous publications. A sterile single tungsten  
38 microelectrode (A-M Systems) was held by a micro-manipulator (Narishige) and inserted  
39 nearly perpendicularly into the auditory cortex through a small opening on the skull (1.0–  
40 1.1mm in diameter) and advanced by a hydraulic micro-drive (David Kopf Instruments).  
41 The tip and impedance of electrode was examined before each recording session (2-  
42 5MΩ impedance). Spikes were detected by a template-based spike sorter (MSD, Alpha  
43 Omega Engineering) and continuously monitored by the experimenter while data

1 recordings progressed. The raw voltage signal was also recorded. Intracellular recording  
2 procedures were identical to those described in our previous publications (Gao et al.  
3 2016; Gao and Wang, 2019). The recordings were made in the auditory cortex through  
4 the intact dura using a concentric recording electrode and guide tube assembly. The  
5 sharp recording pipette was made of quartz glass. The guide tube was made of  
6 borosilicate glass. The sharp recording pipette was pulled by a laser puller (P-2000,  
7 Sutter Instrument), and the guide tube was pulled by a conventional puller (P-97, Sutter  
8 Instrument). The electrode assembly was advanced perpendicularly relative to the  
9 cortical surface with a motorized manipulator (DMA1510, Narishige). The electrical  
10 signals were amplified (Axoclamp 2B, Molecular Devices), digitized (RX6, Tucker-Davis  
11 Technologies), and saved using custom programs (MATLAB, Mathworks).

12

13 **Acoustic stimuli.** Four different stimulus presentation designs were used. 1) Continuous  
14 (100%): the same stimulus was repeatedly delivered from a fixed speaker location over  
15 many trials. 2) Unequal-probability and random (75%, 50%, and 25%): stimulus was  
16 delivered from multiple speaker locations in a randomly shuffled order, but target speaker  
17 has a higher probability than others. 3) Unequal-probability and periodic (50/p%):  
18 stimulus delivered from the target speaker was interleaved with stimulus delivered from  
19 other speakers, so that the stimulus delivered from the target speaker was periodical. 4)  
20 Equal probability (6.7%): stimulus was delivered from multiple speaker locations in a  
21 randomly shuffled order and all speakers shared the same occurrence probability. For  
22 each neuron, if allowed by the experiment conditions, the equal-probability presentation  
23 mode was tested at multiple separate sessions at different time points and other three  
24 presentation modes were tested between the equal-probability presentation mode.

25 Stimuli were generated digitally in MATLAB at a sampling rate of 97.7kHz using  
26 custom software, converted to analog signals (RX6, Tucker-Davies Technologies),  
27 attenuated (PA5, Tucker-Davies Technologies), power amplified (Crown Audio), and  
28 played from specified loudspeaker. The sound tokens used included unfrozen wide-band  
29 noise, frozen wide-band noise, amplitude-modulated wide-band noise and species-  
30 specific vocalizations. Sessions collected under continuous unfrozen wide-band noise  
31 stimuli were used only in Extended Data Fig. 4h. Fixed inter-stimulus intervals (ISI) were  
32 used in four presentation modes. A variety of random ISI were used only in continuous  
33 presentation mode. The shortest ISI was 500ms, and the longest ISI was 5200ms. Rate-  
34 level function was used to find the best sound level of tested neurons. Most neurons  
35 were tested using best sound level, except sound level rank experiments where four  
36 different sound levels were used. The same sound level was used when comparing  
37 different presentation modes.

38

39 **Characterization of spatial receptive fields.** Total firing rates were calculated over a  
40 time window beginning 15ms after stimulus onset and 50ms after stimulus offset. Total  
41 firing rates subtracted by the spontaneous rate was the firing rate. SRF characterization  
42 was identical to our previous studies (Remington and Wang, 2019). The threshold was  
43 the half maximal firing rates. Tuning selectivity was defined as the number of areas that  
44 have higher firing rates than the threshold divided by the total number of areas. Direction

1 selectivity was defined as the product of every area, unit vector and firing rate divided by  
2 the product of every area and firing rate. If a neuron only responded to contralateral and  
3 ipsilateral 90° at horizontal plane and have equal firing rates, then the direction selectivity  
4 was zero. In the plotted SRF, the location of white color dot indicated the preferred sound  
5 location, the dot diameter was proportional to the direction selectivity, the black thick line  
6 was the half-maximum threshold of SRF, area encircled by the threshold was the  
7 reciprocal of tuning selectivity.

8

9 **Identification of cortical areas, layers and cell types.** We used the best frequency  
10 (BF) of neurons to identify the subregions of auditory cortex. For the neurons significantly  
11 responding to at least one tone stimulus played at the front speaker, we specified the  
12 frequency of the tone stimulus that evoked the maximum response rate as the neuron's  
13 BF. Marmoset auditory cortex is situated largely ventral to the lateral sulcus and exhibits  
14 a topographical frequency gradient along the rostral–caudal axis. The boundary between  
15 primary auditory cortex (A1) and the caudal area (caudal-medial and caudal-lateral belt)  
16 can be identified by an abrupt decrease of BF at the high-frequency (caudal) border of  
17 A1. A1 was further divided into the low-frequency ( $\leq 8$ KHz) rostral A1 and high-frequency  
18 ( $> 8$ KHz) caudal A1 along the rostral-caudal axis. First spike depth was the absolute  
19 depth where the first spike was detected from this electrode, and was depended on  
20 thickness of dura, variations in granulation tissue, proximity to the curvature of the sulcus,  
21 and orthogonality of the electrode penetration to the cortical surface. We used the trough  
22 to peak duration of spike waveforms to identify putative excitatory and inhibitory neurons  
23 (Mitchell et al., 2007). Before analyzing the spike duration, we calculated the signal to  
24 noise ratio of spike waveforms (Sabyasachi and Wang, 2012), which was defined as the  
25 action potential peak to peak height divided by the standard deviation of the background  
26 noise over 1ms preceding all spikes ( $20 \times \log_{10}(AP_{\text{peak-peak}}/Noise_{SD})$ ).

27

28 **The proportion of facilitation, adaptation, depolarization and hyperpolarization**  
29 **trials.** The facilitation phase was defined as the trials whose firing rates were at least one  
30 standard deviation above the mean firing rate evoked under the equal-probability  
31 presentation mode. The sum of facilitation trials divided by the total trial number in each  
32 session was defined as the proportion of facilitation trials. The adaptation phase was  
33 defined as the trials whose firing rates were at least one standard deviation below the  
34 mean firing rate evoked under the equal-probability presentation mode. To analyze the  
35 membrane potential change, spikes were removed from voltage signal with a time  
36 window of 3ms centered around the spike peak. The proportion of depolarization and  
37 hyperpolarization trials were calculated similar to the proportion of facilitation and  
38 adaptation trials.

39

40 **Speaker rank and sound level rank.** Speaker tested in each continuous presentation  
41 mode was assigned a rank number based on its firing rate obtained under the equal-  
42 probability presentation mode. Speaker ranked 1st and 15th had the highest and lowest  
43 firing rate among all 15 speakers tested, respectively. When the SRF has a single peak,  
44 speaker ranked 1st and 15th usually had the closest and farthest distance to the

1 preferred direction, respectively. When the SRF has multiple peaks, low ranked speaker  
2 may next to the preferred direction occasionally. We used speaker firing rate rank instead  
3 of distance rank for two reasons: one, the SRF of some neurons was quite dispersive,  
4 thus it was inaccurate to compute the distance between the target speaker and the SRF  
5 center; and two, the SRF center was usually determined by several high ranked  
6 speakers. The contribution of low ranked speakers was not considered when using the  
7 distance rank. For sound level rank, we measured neurons' responses to 200ms wide-  
8 band noise played at four sound levels under the equal-probability presentation mode.  
9 These four sound levels were a series of fixed values with an interval of 20dB.

10

11 **Computational models of location-specific facilitation.** Computational models that  
12 recaptured the location-specific facilitation (LSF) phenomenon were based on two neural  
13 mechanisms (Extended Data Fig. 8a-d): excitatory and inhibitory synaptic depression (EI-  
14 LIF model, see equations 4 and 5) and membrane potential depolarization and  
15 hyperpolarization (MP-LIF model, see equation 6 and 7). EI-LIF model dynamically  
16 changed the depression amplitude of synaptic vesicles release and exponential recovery  
17 time constant. MP-LIF model dynamically changed the resting potential and spiking  
18 threshold. In the LSF, the parameters were modulated by the probability of presentation  
19 speaker, e.g., 100% for continuous presentation mode and 6.7% for equal-probability  
20 presentation mode.

21 The membrane potential  $V_{t+1}$  of a leaky integrate-and-fire (LIF) neuron at time step  
22  $\Delta t$  was:

23  
24 
$$V_{t+1} = -\frac{\Delta t}{C} [g_{e_t}(V_t - E_e) + g_{i_t}(V_t - E_i) + g_{rest}(V_t - E_{rest})] + V_t + \sigma_s \omega_n \sqrt{\Delta t} \quad (1)$$

25  $g_{e_t}$  and  $g_{i_t}$  was the excitatory and inhibitory synaptic conductance (see equations 2 and  
26 3).  $C$ ,  $E_e$ ,  $E_i$  and  $g_{rest}$  was the membrane capacitance, excitatory reversal potential,  
27 inhibitory reversal potential, and leak conductance. Those values were obtained from the  
28 *in vivo* whole-cell recording in the auditory cortex of anesthetized rats (Wehr and Zador,  
29 2003). Gaussian noise  $\sigma_s \omega_n$  was added to generate the spontaneous firing (Lee et al.,  
30 2020). Action potential was evoked when the  $V_{t+1}$  reached the spike threshold  $V_{spike}$ .  
31  $V_{t+1}$  was reset to  $E_{rest}$  after the action potential.  $E_{rest}$  was obtained from our  
32 intracellular studies (Fig. 6h). It was fixed in the EI-LIF model but was dynamically  
33 modulated in MP-LIF model.  $V_{spike}$  is the sum of threshold above resting potential  $V_{th}$   
34 and  $E_{rest}$ . It was fixed in the EI-LIF model but was modulated in MP-LIF model.

35 Excitatory conductance  $g_{e_t}$  and inhibitory conductance  $g_{i_t}$  were:

36 
$$g_{e_t} = P_{rel_e} r N_e \Delta t e^{\frac{\Delta t}{\tau}} + \sigma_c \omega_n \quad (2)$$

37 
$$g_{i_t} = P_{rel_i} N_i \Delta t e^{\frac{\Delta t}{\tau}} + \sigma_c \omega_n \quad (3)$$

38  $P_{rel_e}$  and  $P_{rel_i}$  were the excitatory and inhibitory synaptic release probability,  
39 respectively (see equations 4 and 5).  $P_{rel_e}$  and  $P_{rel_i}$  were modulated in EI-LIF model  
40 but fixed to one in MP-LIF model. The inhibitory and excitatory inputs have the same  
41 strength and occurred simultaneously, so the inhibitory to excitatory ratio  $r$  equal to one  
42 and the inhibitory to excitatory delay  $d$  (not shown in the equation) equal to zero. The

1 number of excitatory inputs  $N_e$ , inhibitory input  $N_i$  and time constant  $\tau$  were fixed and  
 2 conduction noise  $\sigma_c \omega_n$  was added to generate the spontaneous firing (Wehr and Zador,  
 3 2003).

4 For the EI-LIF model, in each trial  $T$ , the excitatory and inhibitory synaptic release  
 5 probability  $P_{rel\_e_{t+1}}$  and  $P_{rel\_i_{t+1}}$  were:

$$6 \quad P_{rel\_e_{t+1}} = 1 + \left( (1 - A_e) P_{rel\_e_t} - 1 \right) e^{\frac{-\Delta t}{P_s \tau_e}} \quad (4)$$

$$7 \quad P_{rel\_i_{t+1}} = 1 + \left( (1 - A_i) P_{rel\_i_t} - 1 \right) e^{\frac{-\Delta t}{P_s \tau_i}} \quad (5)$$

8  $A_e$  and  $A_i$  was the excitatory and inhibitory synaptic depression amplitude, respectively.  
 9  $A_i$  was larger than  $A_e$  because we observed facilitation instead of adaptation in the  
 10 continuous presentation mode. In addition, Heiss et al., 2008 found that inhibition adapts  
 11 more than excitation when repetitively stimulating the whisker.  $A_e$  and  $A_i$  were both  
 12 fixed in the LSF. Relatively small depression amplitude was chosen due to the slow  
 13 facilitation processes observed in the recording data.

14  $\tau_e$  and  $\tau_i$  was the excitatory and inhibitory recovery time constant, respectively.  $\tau_e$   
 15 was longer than  $\tau_i$  because numerous studies found that inhibitory synapses have a  
 16 quick recovery than excitatory synapses (Galarreta and Hestrin, 1998; Varela et al.,  
 17 1999). In the different probability presentation mode, facilitation percent and firing rate  
 18 decreased when the probability of target speaker decreased. Since the time constant  
 19 was stimulus frequency dependent (Galarreta and Hestrin, 1998), therefore the  $\tau_e$  and  
 20  $\tau_i$  were scaled by the presentation probability  $P_s$  which resulted in higher synaptic  
 21 release probability, i.e., less adaptation, when the presentation probability was low. Time  
 22 constant can across multiple time scales from hundreds of milliseconds to tens of  
 23 seconds (Varela et al., 1997; Ulanovsky et al., 2004). Since 44 trials were required to  
 24 reach the first long facilitation phase,  $\tau_e$  and  $\tau_i$  were chosen so that the probability of  
 25 release was stable after 40 trials.

26 Each session is composed of randomly presented trials  $T_r$  for computing the  
 27 facilitation and adaptation threshold and continuously presented trials  $T_c$  for computing  
 28 the facilitation percent, adaptation percent, and firing rate. The median firing rate in the  
 29 100% probability presentation mode was 12 spikes per second. Therefore, the number of  
 30 stimulus count  $N_{SC}$  was chosen so that the average firing rate in the EI-LIF model could  
 31 match the firing rate in the recording data. Notice that  $N_{SC}$  was Poisson distributed and  
 32 not every stimulus input could evoke a spike output in the LIF neuron. We run EI-LIF  
 33 model for two hundred sessions for every presentation probability.

34 For the MP-LIF model, in each trial  $T$ , the dynamic resting membrane potential  
 35  $E_{rest\_MP}$  and spike threshold  $V_{spike}$  were:

$$36 \quad E_{rest\_MP} = \begin{cases} E_{rest}, & 1 \leq T < T_r \\ E_{rest} + P_s M / (T_{th} - 1): E_{rest} + P_s M, & T_r + 1 \leq T < T_r + T_{th} \\ E_{rest} + P_s M, & T_r + T_{th} + 1 \leq T < T_r + T_c \end{cases} \quad (6)$$

$$37 \quad V_{spike} =$$

$$38 \quad \begin{cases} V_{th} + E_{rest}, & 1 \leq T < T_r \\ V_{th} + E_{rest} + P_s MS / (T_{th} - 1): E_{rest} + P_s MS, & T_r + 1 \leq T < T_r + T_{th} \\ V_{th} + E_{rest} + P_s MS, & T_r + T_{th} + 1 \leq T < T_r + T_c \end{cases} \quad (7)$$

1 The depolarization value  $M$  and the number of trials to reach the stabilized  
2 depolarization value  $T_{th}$  were obtained from our intracellular recordings. Since lower  
3 presentation probability evoked less neural facilitation, therefore  $M$  was scaled by the  
4 presentation probability  $P_s$ . Spike threshold  $V_{spike}$  was further modulated by the spike  
5 threshold scale  $S$ . Almost no spike was evoked when  $S$  equal to one but excessive  
6 spikes were evoked when  $S$  equal to zero. Therefore,  $S$  and stimulus count  $N_{SC}$  were  
7 chosen so that the average firing rate matched the recording data. We also run MP-LIF  
8 model for two hundred sessions at every presentation probability. Extended Data Table. 1  
9 listed the names of parameters and corresponding values used in EI-LIF and MP-LIF  
10 model neurons  
11

## 12 **Data availability**

13  
14 Source data for generating Fig. 1 to Fig. 7 has been uploaded to the manuscript tracking  
15 system for review purposes. All the data will be freely accessible upon publication.  
16

## 17 **Code availability**

18  
19 Codes (MATLAB R2022a) for generating Fig. 1 to Fig. 7 and computational models have  
20 been uploaded to the manuscript tracking system for review purposes. All the codes will  
21 be freely accessible upon publication. Codes (MATLAB R2012a) for controlling the TDT  
22 sound presentation and data acquisition system are freely available upon request from  
23 the corresponding author.  
24  
25

26



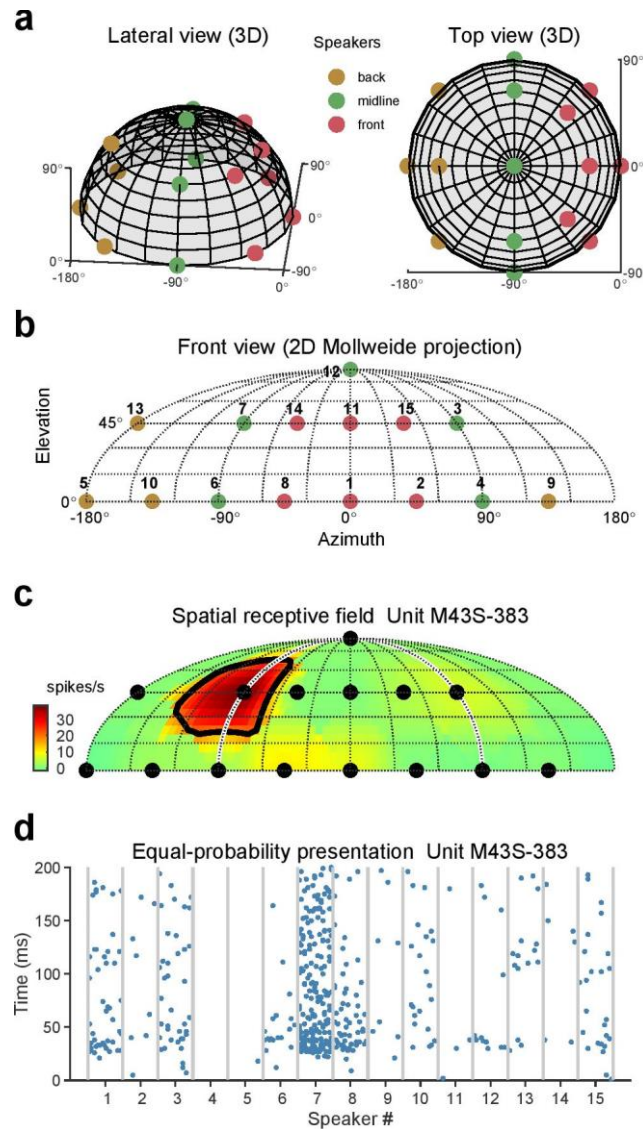

1  
2  
3  
4  
5  
6  
7  
8  
9  
10  
11  
12  
13  
14  
15  
16  
17

### Fig. 1 Speaker layout and equal-probability sound stimulation

**a**, Fifteen equally spaced speakers were placed on a semi-spherical surface centered around the animal's head and above the horizontal plane. View from the front, lateral 35° and elevated 30° (left), and view from directly top (right). Red dots indicate six front speakers, green dots indicate five midline speakers, and brown dots indicate four back speakers.

**b**, Three-dimensional front-back space was projected to a two-dimensional plane around midline for displaying purposes.

**c**, Spatial receptive field of example Unit M43S-383. White semicircle is the boundary of the front-back space. Black line is the threshold which is defined as the half-maximum firing rate. Black dots indicate fifteen speaker locations.

**d**, Spike raster plot of same example neuron at fifteen speaker locations under equal-probability presentation mode. Stimuli at each speaker location were randomly presented ten times.

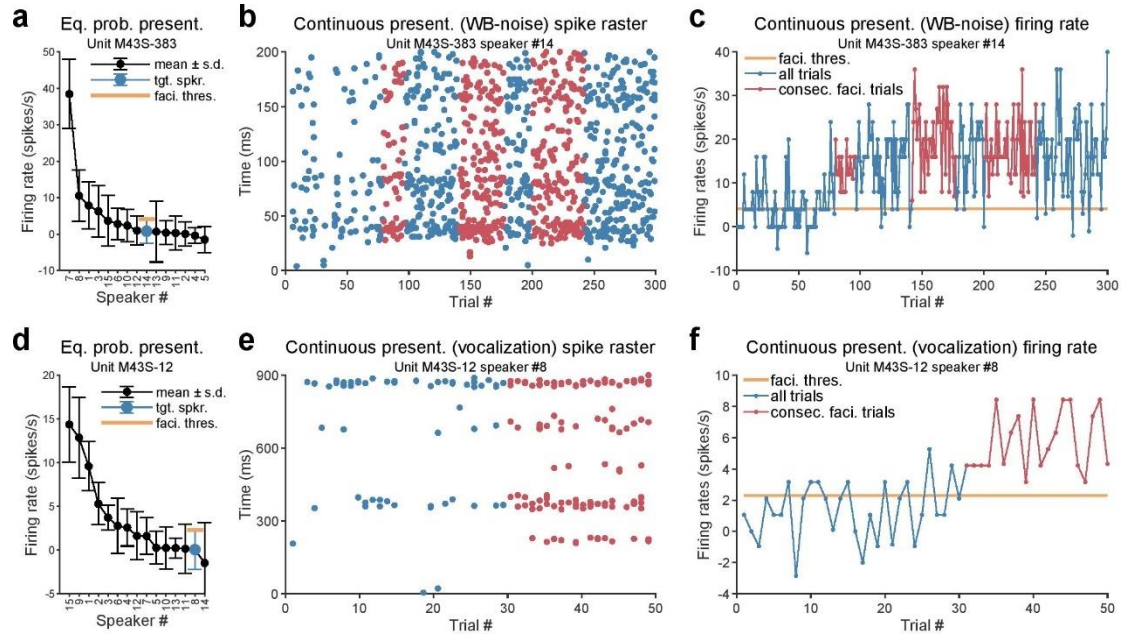

1

2

### 3 **Fig. 2 Repetitive sound stimulation evoked neural facilitation**

4 **a**, Firing rate versus speak number of unit M43S-383 recorded under the equal-  
5 probability presentation mode (same data as **Fig. 1d**). Blue dot and orange bar indicate  
6 the target speaker and facilitation threshold (mean + standard deviation), respectively.  
7 **b**, Spike raster of same example neuron tested at speaker #14 under continuous  
8 presentation mode. Red dots indicate spikes belong to the long facilitation phase (i.e., at  
9 least five consecutive trials with firing rates exceeding the facilitation threshold).  
10 **c**, Trial-by-trial firing rate of same example neuron. Red dots and line indicate trails  
11 belong to the long facilitation phase. Thick orange line indicates the facilitation threshold.  
12 **d-f**, Similar to **a-c**, but for Unit M43S-12 that was tested using marmoset vocalization  
13 stimuli.

14

1

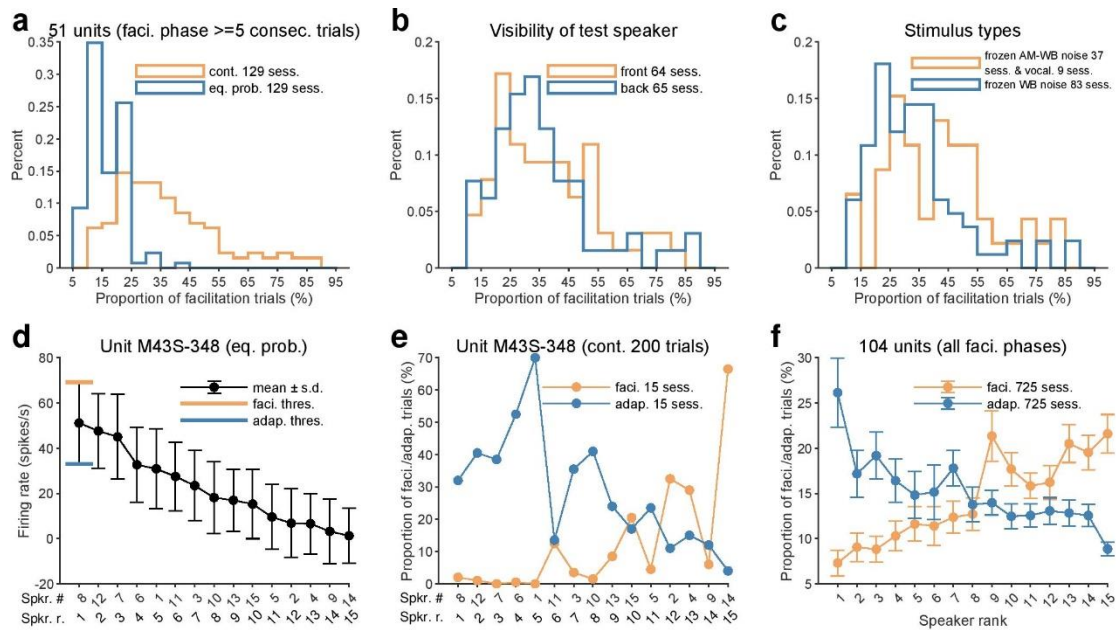

2

3

4 **Fig. 3 Neural facilitation occurred in a variety of stimulus conditions and**  
 5 **depends on sound locations**

6 **a**, Histogram of the proportion of facilitation trials under the continuous (orange line) and  
 7 equal-probability (blue line) presentation modes. Only 129 sessions from fifty-one  
 8 neurons that exhibited facilitation phases lasting at least five consecutive trials were  
 9 shown.

10 **b**, Histogram of the proportion of facilitation trials under the continuous presentation  
 11 mode for target speakers located in the front (orange line) and back (blue line). Front  
 12 speakers: #1, #2, #8, #11, #14, and #15. Back speakers: #3, #4, #5, #6, #7, #9, #10, #12,  
 13 and #13.

14 **c**, Histogram of the proportion of facilitation trials under the continuous presentation  
 15 mode using frozen amplitude-modulated wide-band noise or animal vocalization (orange  
 16 line) and frozen unmodulated wide-band noise (blue line) as stimuli.

17 **d**, Each speaker was assigned a rank number based on its baseline firing rate obtained  
 18 under the equal-probability presentation mode. Speaker ranked 1st had the highest firing  
 19 rate. In this example unit M43S-348, speaker #8 ranked 1st and speaker #14 ranked  
 20 15th. Orange and blue bars indicate facilitation and adaptation threshold, respectively.  
 21 Dots and error bars indicate mean  $\pm$  standard deviation.

22 **e**, Proportion of facilitation (orange dots and lines) and adaptation (blue dots and lines)  
 23 trials under continuous presentation mode at different speaker ranks for the same  
 24 example unit. Stimuli at each speaker location were tested 200 times.

25 **f**, Proportion of facilitation (orange dots and lines) and adaptation (blue dots and lines)  
 26 trials of the population data. All 725 sessions from 104 neurons were shown, regardless  
 27 of the length of the facilitation phase.

28

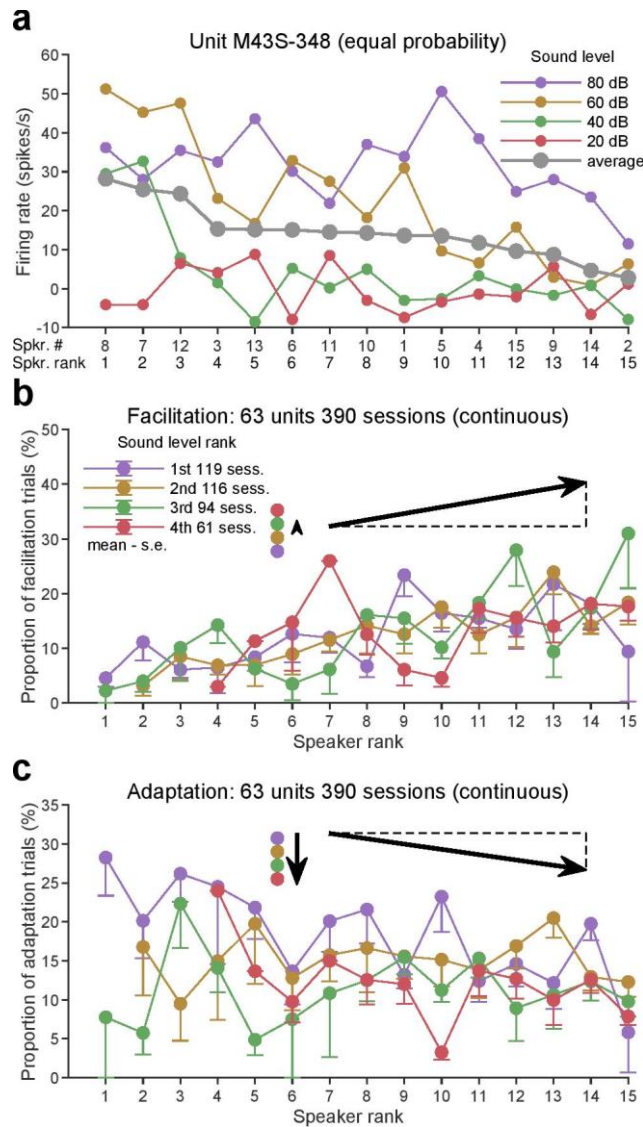

1  
2  
3  
4  
5  
6  
7  
8  
9  
10  
11  
12  
13  
14  
15  
16  
17  
18

**Fig. 4 Neural facilitation primarily depends on sound location but not firing rate**

**a**, Example unit M43S-348's averaged responses to wide-band noise played at four sound levels across fifteen speaker locations (violet/brown/green/red dots and lines). Speaker rank was determined by the averaged firing rate at four sound levels (black dots and line).

**b**, Proportion of facilitation trials at fifteen speaker ranks (same color dots and lines in x-axis) and four sound level ranks (different color dots and bars in y-axis) were assigned based on the response obtained under the equal-probability mode. Length of upwards arrow is proportional to the proportion of facilitation trials averaged across speakers. Slope of the northeast arrow is proportional to the proportion of facilitation trials averaged across sound levels. Dots and error bars indicate mean - standard deviation of mean.

**c**, Similar to **b**, but for adaptation. Length of the downwards arrow is proportional to the proportion of adaptation trials averaged across speakers. Slope of the southeast arrow is proportional to the proportion of adaptation trials averaged across sound levels.



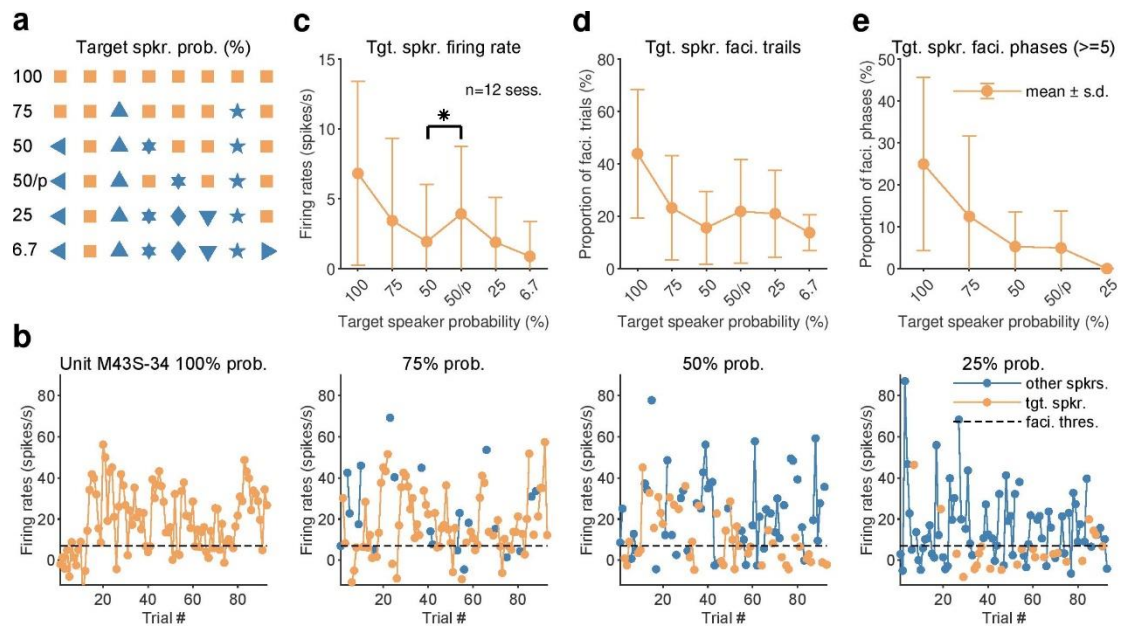

1

2

### 3 **Fig. 5 Dependence of neural facilitation on location continuity**

4 **a**, Six stimulus presentation modes were used in our studies. Continuous presentation  
 5 mode equals to 100% probability presentation mode. 75%, 50% and 25% probabilistic  
 6 presentation modes play sounds from all fifteen speakers in a randomly shuffled order,  
 7 while giving the target speaker (orange square) a presentation probability higher than  
 8 other speakers (blue left-pointing triangle, upward-pointing triangle, hexagram, diamond,  
 9 downward-pointing triangle, pentagram, right-pointing triangle). For the 50% probability  
 10 periodic presentation mode (50/p%), the target speaker was interleaved with other  
 11 speakers. Therefore, the sequence of the target speaker was periodic instead of random.  
 12 Equal-probability presentation mode equals to 6.7% probability presentation mode.

13 **b**, Firing rate of target speaker (orange dots and lines) and other speakers (blue dots and  
 14 lines) for example unit M43S-34 under 100% (left), 75% (middle-left), 50% (middle-right),  
 15 and 25% (right) probability presentation modes. Black dashed line indicates the  
 16 facilitation threshold.

17 **c**, Firing rate of target speaker for six presentation modes. \*,  $p < 0.05$ , rank-sum test. Dots  
 18 and error bars indicate mean  $\pm$  standard deviation.

19 **d**, Proportion of facilitation trials that belong to all facilitation phases at target speaker.

20 **e**, Proportion of facilitation trials that belong to facilitation phases that lasting at least five  
 21 consecutive trials at target speaker.

22

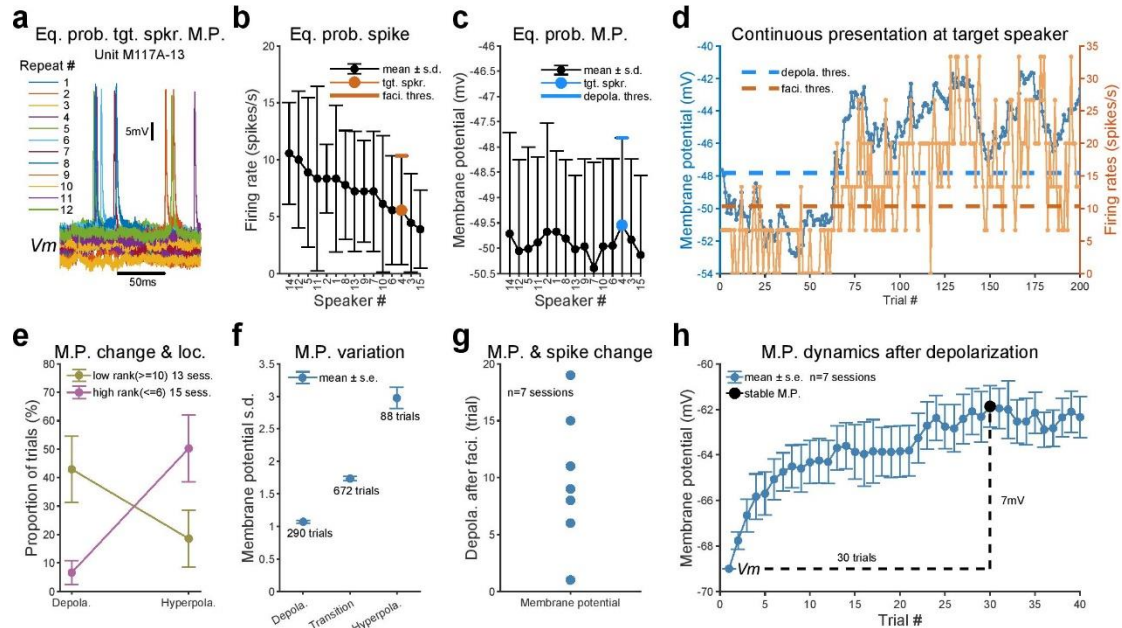

1

2

3 **Fig. 6 Repetitive sound stimulation induced sustained membrane**  
 4 **potential depolarization**

5 **a**, Membrane potential traces of unit M117A-13 recorded under the equal-probability  
 6 presentation mode at the target speaker location. Each color line indicates one trial.

7 **b**, Firing rate based speaker rank of same neuron obtained under the equal-probability  
 8 presentation mode. Orange dot and bar indicate the target speaker and its facilitation  
 9 threshold.

10 **c**, Corresponding membrane potential (spikes removed) at the same speaker rank used  
 11 in **b**. Blue dot and bar indicate the target speaker and its depolarization threshold.

12 **d**, Membrane potential (blue line and dots) and total firing rate (i.e., not minus the  
 13 spontaneous firing rate, orange line and dots) changes during the continuous  
 14 presentation mode. Threshold of facilitation (dashed orange line) and depolarization  
 15 (dashed blue line) were calculated in **b** and **c**, respectively.

16 **e**, Target speakers were divided into a low ranked group (10th to 15th, gold dots and  
 17 bars) and a high ranked group (1st to 6th, violet dots and bars). Dots and error bars  
 18 indicate mean ± standard deviation of mean.

19 **f**, The standard deviation of membrane potential for depolarization, transition and  
 20 hyperpolarization trials across all sessions.

21 **g**, Number of trials needed to achieve the first membrane potential depolarization phase  
 22 and the spiking facilitation phase that both lasting at least five consecutive trials.

23 **h**, Changes in membrane potential magnitude after depolarization (blue dots and line).  
 24 Black dot indicates the stabilized membrane potential.

25



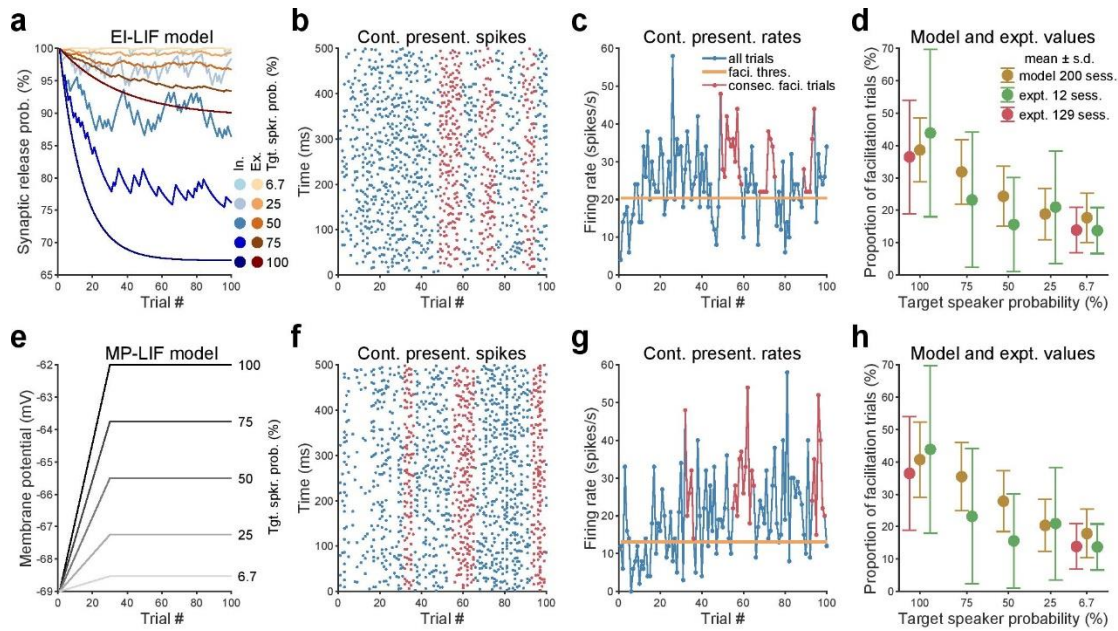

1  
2  
3  
4  
5  
6  
7  
8  
9  
10  
11  
12  
13  
14  
15  
16  
17  
18  
19  
20  
21  
22  
23  
24

**Fig. 7 Computational models suggest two distinct neural mechanisms underlying location-specific facilitation**

**a**, Inhibitory (blue lines and dots) and excitatory (orange lines and dots) synaptic depression leaky integrate-and-fire model (EI-LIF model). Under the continuous presentation mode, synaptic release probability at five probability presentation modes decreased gradually.

**b**, Spike raster plot for one session of EI-model neuron during continuous sound presentation mode. Red dots indicate spikes belong to long facilitation phase (i.e., at least five consecutive trials with firing rates exceeding the facilitation threshold).

**c**, Trial-by-trial firing rate from the same session of EI-model neuron. Red dots and line indicate trails belong to the long facilitation phase. Thick orange line indicates the facilitation threshold (i.e., one standard deviation above the baseline firing rate).

**d**, Decrease the presentation probability of target speaker resulted in a smaller proportion of facilitation trials for 200 sessions of EI-LIF model neuron (brown dots and bars). Green dots and bars show the data from five probability presentation modes (twelve sessions, same as Fig. 5d). Red dots and bars show the data from continuous and equal-probability presentation modes (129 sessions, same as Fig. 3a). Dots and error bars indicate mean  $\pm$  standard deviation.

**e-h**, Similar to **a-d** but for membrane potential depolarization leaky integrate-and-fire model (MP-LIF model).

## 1    **References**

- 2    1.    Andreou, L.V., Kashino, M. & Chait, M. The role of temporal regularity in auditory  
3    segregation. *Hear Res* **280**, 228-235 (2011).
- 4    2.    Asari, H. & Zador, A.M. Long-lasting context dependence constrains neural encoding  
5    models in rodent auditory cortex. *J Neurophysiol* **102**, 2638-2656 (2009).
- 6    3.    Auksztulewicz, R., *et al.* The Cumulative Effects of Predictability on Synaptic Gain in the  
7    Auditory Processing Stream. *J Neurosci* **37**, 6751-6760 (2017).
- 8    4.    Awwad, B., Jankowski, M.M. & Nelken, I. Synaptic Recruitment Enhances Gap  
9    Termination Responses in Auditory Cortex. *Cereb Cortex* **30**, 4465-4480 (2020).
- 10    5.    Barascud, N., Pearce, M.T., Griffiths, T.D., Friston, K.J. & Chait, M. Brain responses in  
11    humans reveal ideal observer-like sensitivity to complex acoustic patterns. *Proc Natl Acad Sci*  
12    *U S A* **113**, E616-625 (2016).
- 13    6.    Bartlett, E.L. & Wang, X. Long-lasting modulation by stimulus context in primate auditory  
14    cortex. *J Neurophysiol* **94**, 83-104 (2005).
- 15    7.    Bendixen, A., Denham, S.L., Gyimesi, K. & Winkler, I. Regular patterns stabilize auditory  
16    streams. *J Acoust Soc Am* **128**, 3658-3666 (2010).
- 17    8.    Brosch, M. & Scheich, H. Tone-sequence analysis in the auditory cortex of awake  
18    macaque monkeys. *Exp Brain Res* **184**, 349-361 (2008).
- 19    9.    Brosch, M. & Schreiner, C.E. Sequence sensitivity of neurons in cat primary auditory cortex.  
20    *Cereb Cortex* **10**, 1155-1167 (2000).
- 21    10.    Brosch, M., Schulz, A. & Scheich, H. Processing of sound sequences in macaque auditory  
22    cortex: response enhancement. *J Neurophysiol* **82**, 1542-1559 (1999).
- 23    11.    Calford, M.B. & Semple, M.N. Monaural inhibition in cat auditory cortex. *J Neurophysiol*  
24    **73**, 1876-1891 (1995).
- 25    12.    Carbajal, G.V. & Malmierca, M.S. The Neuronal Basis of Predictive Coding Along the  
26    Auditory Pathway: From the Subcortical Roots to Cortical Deviance Detection. *Trends Hear* **22**,  
27    2331216518784822 (2018).
- 28    13.    Chadderton, P., Agapiou, J.P., McAlpine, D. & Margrie, T.W. The synaptic representation  
29    of sound source location in auditory cortex. *J Neurosci* **29**, 14127-14135 (2009).
- 30    14.    Chaplin, T.A., Yu, H.H. & Rosa, M.G. Representation of the visual field in the primary visual  
31    area of the marmoset monkey: magnification factors, point-image size, and proportionality to  
32    retinal ganglion cell density. *J Comp Neurol* **521**, 1001-1019 (2013).
- 33    15.    Chen, I.W., Helmchen, F. & Lutcke, H. Specific Early and Late Oddball-Evoked Responses  
34    in Excitatory and Inhibitory Neurons of Mouse Auditory Cortex. *J Neurosci* **35**, 12560-12573  
35    (2015).
- 36    16.    Cherry, E.C. Some experiments on the Recognition of Speech with one or two ears. *J*  
37    *Acoust Soc Am* (1953).
- 38    17.    Condon, C.D. & Weinberger, N.M. Habituation produces frequency-specific plasticity of  
39    receptive fields in the auditory cortex. *Behav Neurosci* **105**, 416-430 (1991).
- 40    18.    Dragoi, V., Sharma, J. & Sur, M. Adaptation-induced plasticity of orientation tuning in adult  
41    visual cortex. *Neuron* **28**, 287-298 (2000).
- 42    19.    Farley, B.J., Quirk, M.C., Doherty, J.J. & Christian, E.P. Stimulus-specific adaptation in  
43    auditory cortex is an NMDA-independent process distinct from the sensory novelty encoded by

- 1 the mismatch negativity. *J Neurosci* **30**, 16475-16484 (2010).
- 2 20. Feng, L. & Wang, X. Harmonic template neurons in primate auditory cortex underlying
- 3 complex sound processing. *Proc Natl Acad Sci U S A* **114**, E840-E848 (2017).
- 4 21. Fishman, Y.I. & Steinschneider, M. Searching for the mismatch negativity in primary
- 5 auditory cortex of the awake monkey: deviance detection or stimulus specific adaptation? *J*
- 6 *Neurosci* **32**, 15747-15758 (2012).
- 7 22. Fitzpatrick, D.C., Kuwada, S., Kim, D.O., Parham, K. & Batra, R. Responses of neurons to
- 8 click-pairs as simulated echoes: auditory nerve to auditory cortex. *J Acoust Soc Am* **106**, 3460-
- 9 3472 (1999).
- 10 23. Galarreta, M. & Hestrin, S. Frequency-dependent synaptic depression and the balance of
- 11 excitation and inhibition in the neocortex. *Nat Neurosci* **1**, 587-594 (1998).
- 12 24. Gao, L., Kostlan, K., Wang, Y. & Wang, X. Distinct Subthreshold Mechanisms Underlying
- 13 Rate-Coding Principles in Primate Auditory Cortex. *Neuron* **91**, 905-919 (2016).
- 14 25. Gao, L. & Wang, X. Subthreshold Activity Underlying the Diversity and Selectivity of the
- 15 Primary Auditory Cortex Studied by Intracellular Recordings in Awake Marmosets. *Cereb*
- 16 *Cortex* **29**, 994-1005 (2019).
- 17 26. Harpaz, M., Jankowski, M.M., Khouri, L. & Nelken, I. Emergence of abstract sound
- 18 representations in the ascending auditory system. *Prog Neurobiol* **202**, 102049 (2021).
- 19 27. Heiss, J.E., Katz, Y., Ganmor, E. & Lampl, I. Shift in the balance between excitation and
- 20 inhibition during sensory adaptation of S1 neurons. *J Neurosci* **28**, 13320-13330 (2008).
- 21 28. Hershenhoren, I., Taaseh, N., Antunes, F.M. & Nelken, I. Intracellular correlates of
- 22 stimulus-specific adaptation. *J Neurosci* **34**, 3303-3319 (2014).
- 23 29. Huang, N. & Elhilali, M. Push-pull competition between bottom-up and top-down auditory
- 24 attention to natural soundscapes. *Elife* **9** (2020).
- 25 30. Kato, H.K., Gillet, S.N. & Isaacson, J.S. Flexible Sensory Representations in Auditory
- 26 Cortex Driven by Behavioral Relevance. *Neuron* **88**, 1027-1039 (2015).
- 27 31. Kayser, C., Petkov, C.I., Lippert, M. & Logothetis, N.K. Mechanisms for allocating auditory
- 28 attention: an auditory saliency map. *Curr Biol* **15**, 1943-1947 (2005).
- 29 32. Keating, P., Dahmen, J.C. & King, A.J. Complementary adaptive processes contribute to
- 30 the developmental plasticity of spatial hearing. *Nat Neurosci* **18**, 185-187 (2015).
- 31 33. Kilgard, M.P. & Merzenich, M.M. Order-sensitive plasticity in adult primary auditory cortex.
- 32 *Proc Natl Acad Sci U S A* **99**, 3205-3209 (2002).
- 33 34. Kommajosyula, S.P., Bartlett, E.L., Cai, R., Ling, L. & Caspary, D.M. Corticothalamic
- 34 projections deliver enhanced responses to medial geniculate body as a function of the temporal
- 35 reliability of the stimulus. *J Physiol* **599**, 5465-5484 (2021).
- 36 35. Kuchibhotla, K.V., *et al.* Parallel processing by cortical inhibition enables context-
- 37 dependent behavior. *Nat Neurosci* **20**, 62-71 (2017).
- 38 36. Kyweriga, M., Stewart, W., Cahill, C. & Wehr, M. Synaptic mechanisms underlying
- 39 interaural level difference selectivity in rat auditory cortex. *J Neurophysiol* **112**, 2561-2571
- 40 (2014).
- 41 37. Lee, C.C. & Middlebrooks, J.C. Auditory cortex spatial sensitivity sharpens during task
- 42 performance. *Nat Neurosci* **14**, 108-114 (2011).
- 43 38. Lesicko, A.M.H., Angeloni, C.F., Blackwell, J.M., De Biasi, M. & Geffen, M.N. Corticofugal
- 44 regulation of predictive coding. *Elife* **11** (2022).

- 1 39. Luck, S.J., Chelazzi, L., Hillyard, S.A. & Desimone, R. Neural mechanisms of spatial  
2 selective attention in areas V1, V2, and V4 of macaque visual cortex. *J Neurophysiol* **77**, 24-42  
3 (1997).
- 4 40. Malmierca, M.S. & Aukszulewicz, R. Stimulus-specific adaptation, MMN and predictive  
5 coding. *Hear Res* **399**, 108076 (2021).
- 6 41. Malmierca, M.S., Sanchez-Vives, M.V., Escera, C. & Bendixen, A. Neuronal adaptation,  
7 novelty detection and regularity encoding in audition. *Front Syst Neurosci* **8**, 111 (2014).
- 8 42. Malone, B.J., Scott, B.H. & Semple, M.N. Context-dependent adaptive coding of interaural  
9 phase disparity in the auditory cortex of awake macaques. *J Neurosci* **22**, 4625-4638 (2002).
- 10 43. Masutomi, K., Barascud, N., Kashino, M., McDermott, J.H. & Chait, M. Sound segregation  
11 via embedded repetition is robust to inattention. *J Exp Psychol Hum Percept Perform* **42**, 386-  
12 400 (2016).
- 13 44. McDermott, J.H. The cocktail party problem. *Curr Biol* **19**, R1024-1027 (2009).
- 14 45. McDermott, J.H., Wroblewski, D. & Oxenham, A.J. Recovering sound sources from  
15 embedded repetition. *Proc Natl Acad Sci U S A* **108**, 1188-1193 (2011).
- 16 46. McGinley, M.J., David, S.V. & McCormick, D.A. Cortical Membrane Potential Signature of  
17 Optimal States for Sensory Signal Detection. *Neuron* **87**, 179-192 (2015).
- 18 47. Mickey, B.J. & Middlebrooks, J.C. Representation of auditory space by cortical neurons in  
19 awake cats. *J Neurosci* **23**, 8649-8663 (2003).
- 20 48. Mickey, B.J. & Middlebrooks, J.C. Sensitivity of auditory cortical neurons to the locations  
21 of leading and lagging sounds. *J Neurophysiol* **94**, 979-989 (2005).
- 22 49. Middlebrooks, J.C. & Pettigrew, J.D. Functional classes of neurons in primary auditory  
23 cortex of the cat distinguished by sensitivity to sound location. *J Neurosci* **1**, 107-120 (1981).
- 24 50. Mitchell, J.F., Sundberg, K.A. & Reynolds, J.H. Differential attention-dependent response  
25 modulation across cell classes in macaque visual area V4. *Neuron* **55**, 131-141 (2007).
- 26 51. Mrsic-Flogel, T.D., King, A.J. & Schnupp, J.W. Encoding of virtual acoustic space stimuli  
27 by neurons in ferret primary auditory cortex. *J Neurophysiol* **93**, 3489-3503 (2005).
- 28 52. Naatanen, R., Paavilainen, P., Rinne, T. & Alho, K. The mismatch negativity (MMN) in basic  
29 research of central auditory processing: a review. *Clin Neurophysiol* **118**, 2544-2590 (2007).
- 30 53. Natan, R.G., *et al.* Complementary control of sensory adaptation by two types of cortical  
31 interneurons. *Elife* **4** (2015).
- 32 54. Natan, R.G., Rao, W. & Geffen, M.N. Cortical Interneurons Differentially Shape Frequency  
33 Tuning following Adaptation. *Cell Rep* **21**, 878-890 (2017).
- 34 55. Nelken, I. Stimulus-specific adaptation and deviance detection in the auditory system:  
35 experiments and models. *Biol Cybern* **108**, 655-663 (2014).
- 36 56. Nelken, I., Prut, Y., Vaddia, E. & Abeles, M. Population responses to multifrequency sounds  
37 in the cat auditory cortex: four-tone complexes. *Hear Res* **72**, 223-236 (1994).
- 38 57. Nelken, I., Yaron, A., Polterovich, A. & Hershenhoren, I. Stimulus-specific adaptation  
39 beyond pure tones. *Adv Exp Med Biol* **787**, 411-418 (2013).
- 40 58. Nieto-Diego, J. & Malmierca, M.S. Topographic Distribution of Stimulus-Specific  
41 Adaptation across Auditory Cortical Fields in the Anesthetized Rat. *PLoS Biol* **14**, e1002397  
42 (2016).
- 43 59. O'Neill, W.E. & Suga, N. Target range-sensitive neurons in the auditory cortex of the  
44 mustache bat. *Science* **203**, 69-73 (1979).



- 1 60. Parras, G.G., *et al.* Neurons along the auditory pathway exhibit a hierarchical organization  
2 of prediction error. *Nat Commun* **8**, 2148 (2017).
- 3 61. Perez-Gonzalez, D., *et al.* Deviance detection in physiologically identified cell types in the  
4 rat auditory cortex. *Hear Res* **399**, 107997 (2021).
- 5 62. Phillips, E.A.K., Schreiner, C.E. & Hasenstaub, A.R. Diverse effects of stimulus history in  
6 waking mouse auditory cortex. *J Neurophysiol* **118**, 1376-1393 (2017).
- 7 63. Polterovich, A., Jankowski, M.M. & Nelken, I. Deviance sensitivity in the auditory cortex of  
8 freely moving rats. *PLoS One* **13**, e0197678 (2018).
- 9 64. Popescu, M.V. & Polley, D.B. Monaural deprivation disrupts development of binaural  
10 selectivity in auditory midbrain and cortex. *Neuron* **65**, 718-731 (2010).
- 11 65. Reale, R.A. & Brugge, J.F. Directional sensitivity of neurons in the primary auditory (AI)  
12 cortex of the cat to successive sounds ordered in time and space. *J Neurophysiol* **84**, 435-450  
13 (2000).
- 14 66. Remington, E.D. & Wang, X. Neural Representations of the Full Spatial Field in Auditory  
15 Cortex of Awake Marmoset (*Callithrix jacchus*). *Cereb Cortex* **29**, 1199-1216 (2019).
- 16 67. Reynolds, J.H., Pasternak, T. & Desimone, R. Attention increases sensitivity of V4 neurons.  
17 *Neuron* **26**, 703-714 (2000).
- 18 68. Sadagopan, S. & Wang, X. Level invariant representation of sounds by populations of  
19 neurons in primary auditory cortex. *J Neurosci* **28**, 3415-3426 (2008).
- 20 69. Sadagopan, S. & Wang, X. Nonlinear spectrotemporal interactions underlying selectivity  
21 for complex sounds in auditory cortex. *J Neurosci* **29**, 11192-11202 (2009).
- 22 70. Scholes, C., Palmer, A.R. & Sumner, C.J. Forward suppression in the auditory cortex is  
23 frequency-specific. *Eur J Neurosci* **33**, 1240-1251 (2011).
- 24 71. Shamma, S.A. & Micheyl, C. Behind the scenes of auditory perception. *Curr Opin*  
25 *Neurobiol* **20**, 361-366 (2010).
- 26 72. Southwell, R., *et al.* Is predictability salient? A study of attentional capture by auditory  
27 patterns. *Philos Trans R Soc Lond B Biol Sci* **372** (2017).
- 28 73. Suga, N., O'Neill, W.E. & Manabe, T. Harmonic-sensitive neurons in the auditory cortex of  
29 the mustache bat. *Science* **203**, 270-274 (1979).
- 30 74. Sutter, M.L. & Schreiner, C.E. Physiology and topography of neurons with multi-peaked  
31 tuning curves in cat primary auditory cortex. *J Neurophysiol* **65**, 1207-1226 (1991).
- 32 75. Thomas, J.M., *et al.* Stimulus-specific adaptation in specialized neurons in the inferior  
33 colliculus of the big brown bat, *Eptesicus fuscus*. *Hear Res* **291**, 34-40 (2012).
- 34 76. Torrado Pacheco, A., *et al.* Rapid and active stabilization of visual cortical firing rates  
35 across light-dark transitions. *Proc Natl Acad Sci U S A* **116**, 18068-18077 (2019).
- 36 77. Ulanovsky, N., Las, L., Farkas, D. & Nelken, I. Multiple time scales of adaptation in auditory  
37 cortex neurons. *J Neurosci* **24**, 10440-10453 (2004).
- 38 78. Ulanovsky, N., Las, L. & Nelken, I. Processing of low-probability sounds by cortical neurons.  
39 *Nat Neurosci* **6**, 391-398 (2003).
- 40 79. van der Heijden, K., Rauschecker, J.P., Formisano, E., Valente, G. & de Gelder, B. Active  
41 Sound Localization Sharpens Spatial Tuning in Human Primary Auditory Cortex. *J Neurosci* **38**,  
42 8574-8587 (2018).
- 43 80. Wang, C.A., Boehnke, S.E., Itti, L. & Munoz, D.P. Transient pupil response is modulated  
44 by contrast-based saliency. *J Neurosci* **34**, 408-417 (2014).



- 1 81. Wang, X. Cortical Coding of Auditory Features. *Annu Rev Neurosci* **41**, 527-552 (2018).  
2 82. Wehr, M. & Zador, A.M. Synaptic mechanisms of forward suppression in rat auditory cortex.  
3 *Neuron* **47**, 437-445 (2005).  
4 83. Woods, T.M., Lopez, S.E., Long, J.H., Rahman, J.E. & Recanzone, G.H. Effects of stimulus  
5 azimuth and intensity on the single-neuron activity in the auditory cortex of the alert macaque  
6 monkey. *J Neurophysiol* **96**, 3323-3337 (2006).  
7 84. Yan, Y., Zhaoping, L. & Li, W. Bottom-up saliency and top-down learning in the primary  
8 visual cortex of monkeys. *Proc Natl Acad Sci U S A* **115**, 10499-10504 (2018).  
9 85. Yaron, A., Hershenhoren, I. & Nelken, I. Sensitivity to complex statistical regularities in rat  
10 auditory cortex. *Neuron* **76**, 603-615 (2012).  
11 86. Zhou, Y. & Wang, X. Level dependence of spatial processing in the primate auditory cortex.  
12 *J Neurophysiol* **108**, 810-826 (2012).  
13 87. Zhou, Y. & Wang, X. Spatially extended forward suppression in primate auditory cortex.  
14 *Eur J Neurosci* **39**, 919-933 (2014).  
15

## 16 **Acknowledgements**

17

18 This research was supported by National Institute of Health grants DC003180 and  
19 DC005808 to X.W. We thank A. Pistorio, and J. Estes for assistance with animal care, X.  
20 Song, X. Liu, and H. Mandal for their comments on the earlier versions of the manuscript.  
21

## 22 **Competing interests**

23

24 The authors declare no completing interests.  
25

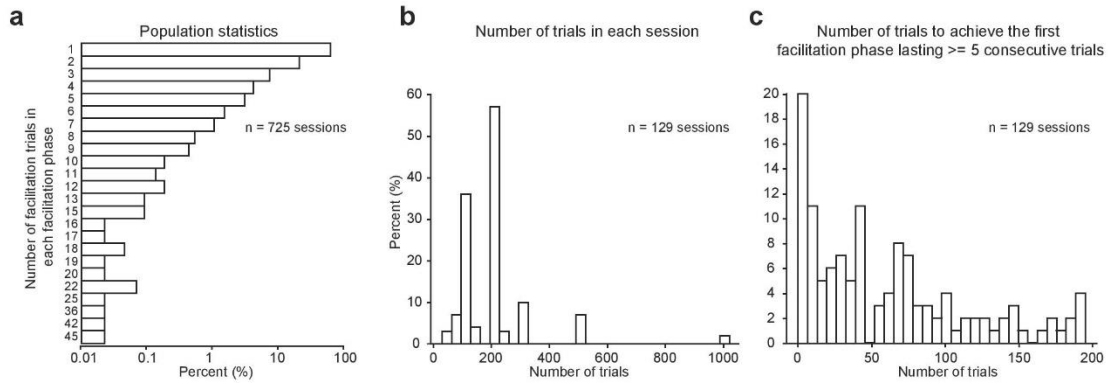

1

2

### 3 **Extended Data Fig. 1 Population statistics**

4 **a**, Logarithmic histogram of the number of facilitated trials in each facilitation phase. We  
5 chose the sessions that exhibited facilitation phases lasting at least five consecutive trials  
6 as the threshold. Fifty-one neurons passed the threshold.

7 **b**, Histogram of the proportion of tested trials in each session (fifty-one neurons).

8 **c**, Histogram of the proportion of trials that was required to achieve the first facilitation  
9 phase lasting at least five consecutive trials (fifty-one neurons).

10

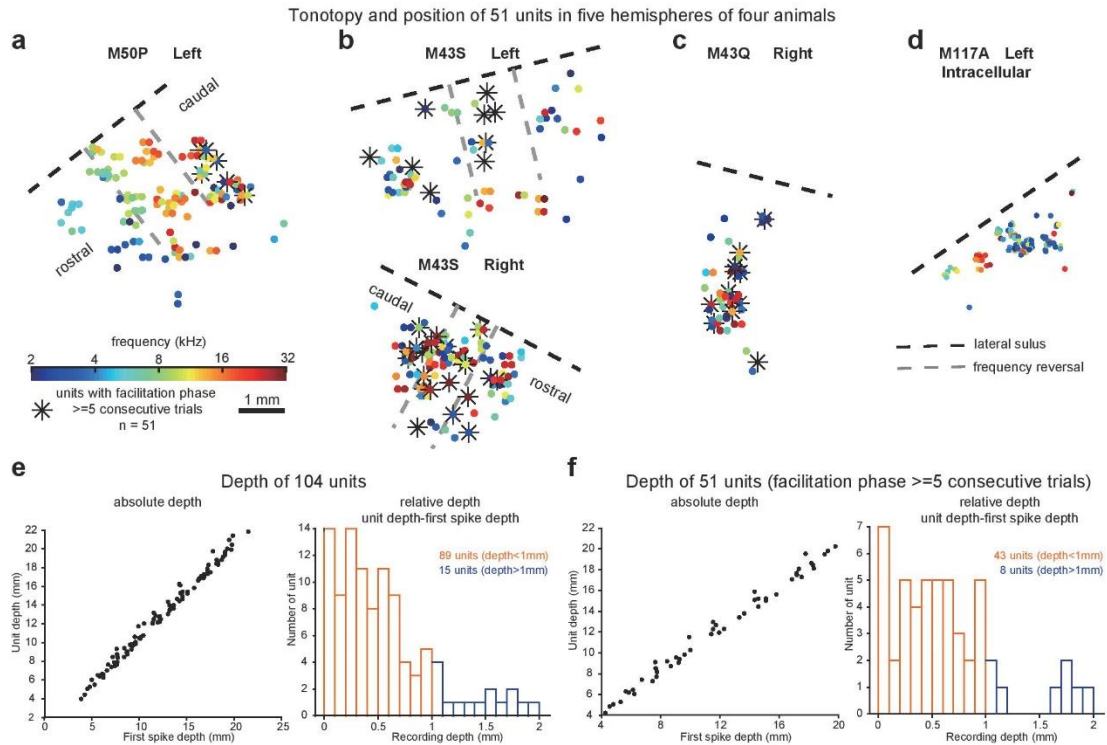

1  
2

### 3 Extended Data Fig. 2 Facilitation neurons across cortical areas and 4 layers

5 **a-d**, Best frequency (BF) distribution on the cortical surface from five hemispheres of four  
6 monkeys. The BF of recorded neurons (color dots) was examined based on their  
7 responses to pure tones stimuli ranging from 2kHz (blue) to 32kHz (red). Fifty-one  
8 neurons that exhibited facilitation phases lasting at least five consecutive trials were  
9 labeled with asterisks. The black dashed line marked the lateral sulcus line approximated  
10 by the bone suture in the temporal lobe. The auditory cortex was divided (gray dashed  
11 line) into the rostral primary auditory cortex (A1), caudal A1, and caudal area (caudal  
12 lateral and caudal medial) along the rostral-caudal axis based on the BF distribution  
13 change. **a**, Tonotopy from left hemisphere of Monkey 1. Six facilitated neurons were  
14 located in caudal area. **b**, Ten facilitated neurons (two overlapped) located in A1 of left  
15 hemisphere (top) and twenty-two facilitated neurons (two overlapped) located in A1 and  
16 caudal area of right hemisphere (bottom) of Monkey 2. **c**, Thirteen facilitated neurons  
17 (two overlapped) from right hemisphere of Monkey 3. **d**, Fourteen neurons were recorded  
18 using the intracellular recording method in the left hemisphere of Monkey 4.

19 **e**, Depth information for all the 104 neurons. Left, first spike depth (x-axis) is the absolute  
20 depth where the first spike is detected, unit depth (y-axis) is the absolute depth where the  
21 neuron is recorded currently. Right, recording depth equals to the relative depth which is  
22 calculated as the unit depth minus first spike depth. Eighty-nine neurons came from  
23 supragranular layers (recording depth less than 1mm, orange bars).

24 **f**, Same to **e** but for fifty-one neurons that exhibited facilitation phases lasting at least five  
25 consecutive trials. Forty-three neurons came from supragranular layers (orange bars).

26

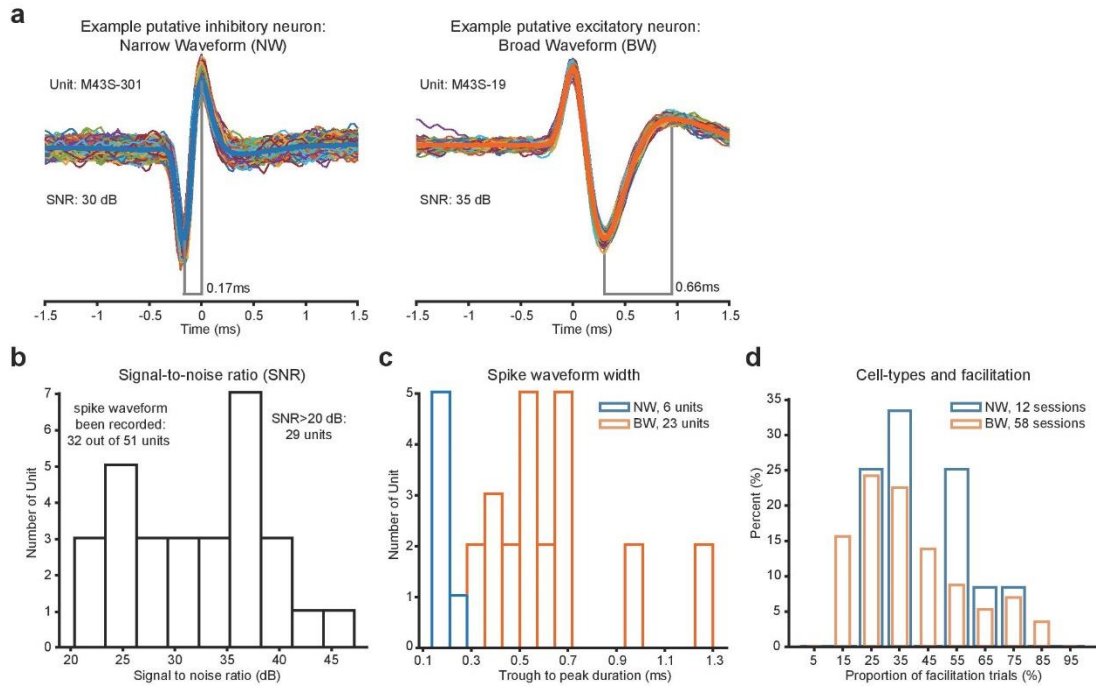

1  
2  
3  
4  
5  
6  
7  
8  
9  
10  
11  
12  
13  
14  
15

**Extended Data Fig. 3 Facilitation in putative excitatory and inhibitory neurons**

**a**, Example putative inhibitory narrow-waveform (NW, left) and putative excitatory broad-waveform (BW, right) neurons.

**b**, Among the fifty-one neurons with facilitation phase lasting at least five consecutive trials, the waveform of thirty-two neurons has been recorded. Twenty-nine neurons have a signal-to-noise ratio that was larger than 20dB.

**c**, Among the twenty-nine neurons, we used 0.3ms trough to peak duration as the boundary for classifying putative inhibitory (blue bars) and excitatory (orange bars) neurons. 21% of neurons were classified as putative inhibitory neurons.

**d**, Histogram of the proportion of facilitation trials between putative inhibitory (blue bars) and excitatory (orange bars) neurons.

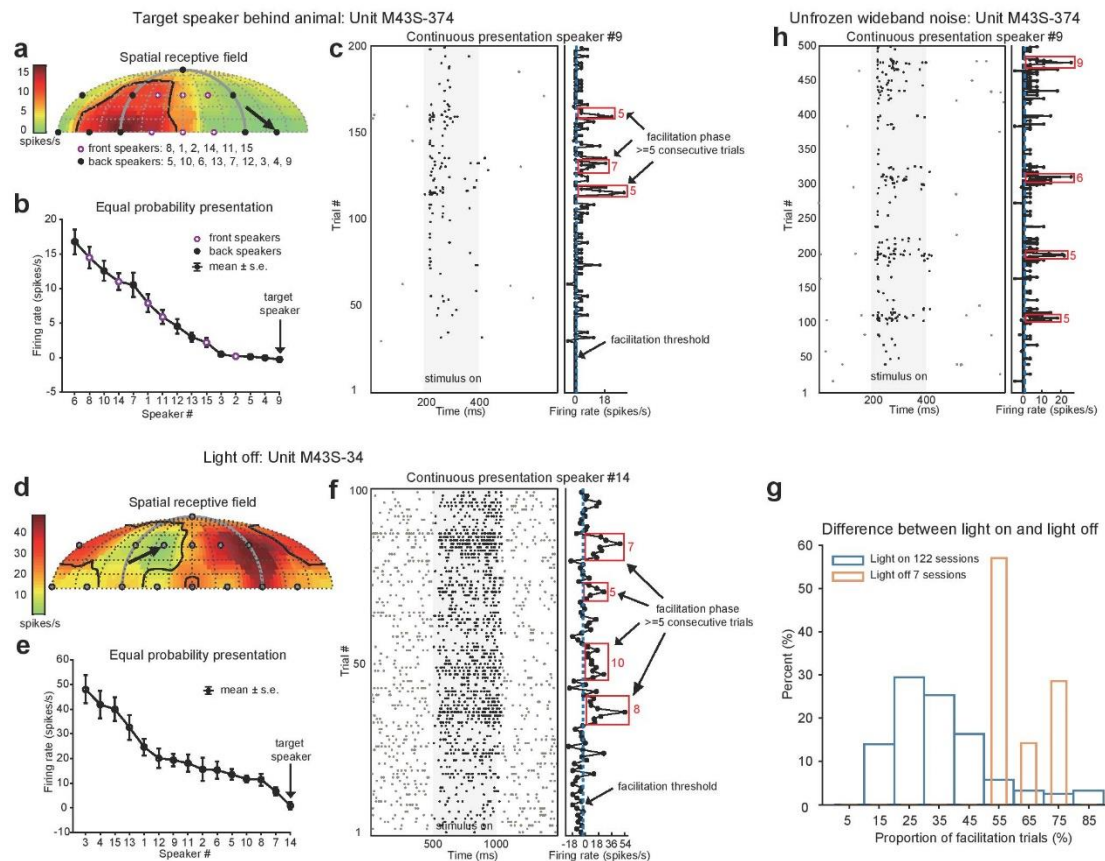

1

2

### 3 **Extended Data Fig. 4 Facilitation occurred in the back, in the darkness,** 4 **in using unfrozen wideband noises**

5 **a**, Spatial receptive field of example unit M43S-374 obtained under equal-probability  
 6 presentation mode. Black arrow indicates the spatial location of continuously presented  
 7 stimuli. Six orange circles indicate front speakers, and nine black dots indicate back  
 8 speakers.

9 **b**, Firing rate versus speaker number of same example neuron under the equal-probability  
 10 presentation mode.

11 **c**, Left, spike raster of same example neuron tested at speaker #9 under continuous  
 12 sound presentation mode. Gray shaded area indicates the sound presentation period.  
 13 Right, trial-by-trial firing rate. Dashed blue line indicates the facilitation threshold. Red  
 14 squares include trials belonging to the long facilitation phase (i.e., at least five  
 15 consecutive trials with firing rates exceeding the facilitation threshold).

16 **d-f**, Similar to **a-c**, but the example unit M43S-34 was tested under the light-off condition.

17 **g**, Histogram of the proportion of facilitation trials under the continuous presentation  
 18 mode for light on (blue bars) and off (orange bars) sessions. Among the seven light-off  
 19 sessions, five sessions were tested when light was turned off, and two sessions were  
 20 tested when both eyes were blocked by an acoustic drape.

21 **h**, Unfrozen wideband noise stimuli were tested for example unit M43S-374. Four  
 22 sessions tested with unfrozen wideband noise stimuli were not included in 129 sessions  
 23 mentioned above.

24



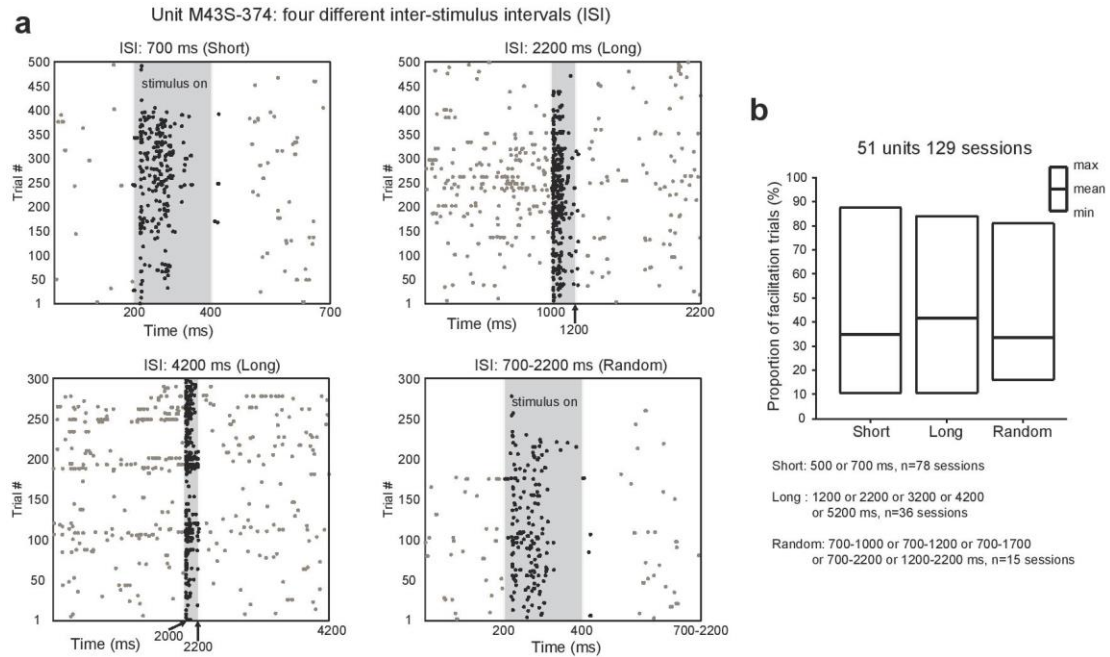

1

2

### 3 **Extended Data Fig. 5 Facilitation occurred using different ISIs**

4 **a**, Example unit M43S-374 showed neural facilitation at fixed length 700ms ISI (top left),  
5 2200ms ISI (top right), 4200ms ISI (bottom left), and random length 700-2200ms ISI  
6 (bottom right). Gray shaded area indicates the sound presentation period.

7 **b**, Across the 129 sessions with facilitation phase lasting at least five consecutive trials,  
8 ISIs were classified into three groups: short (500 and 700ms, 78 sessions), long (1200,  
9 2200, 3200, 4200 and 5200ms, 36 sessions) and random (700-1000 or 700-1200 or 700-1700-  
10 1700 or 700-2200 or 1200-2200ms, 15 sessions).

11

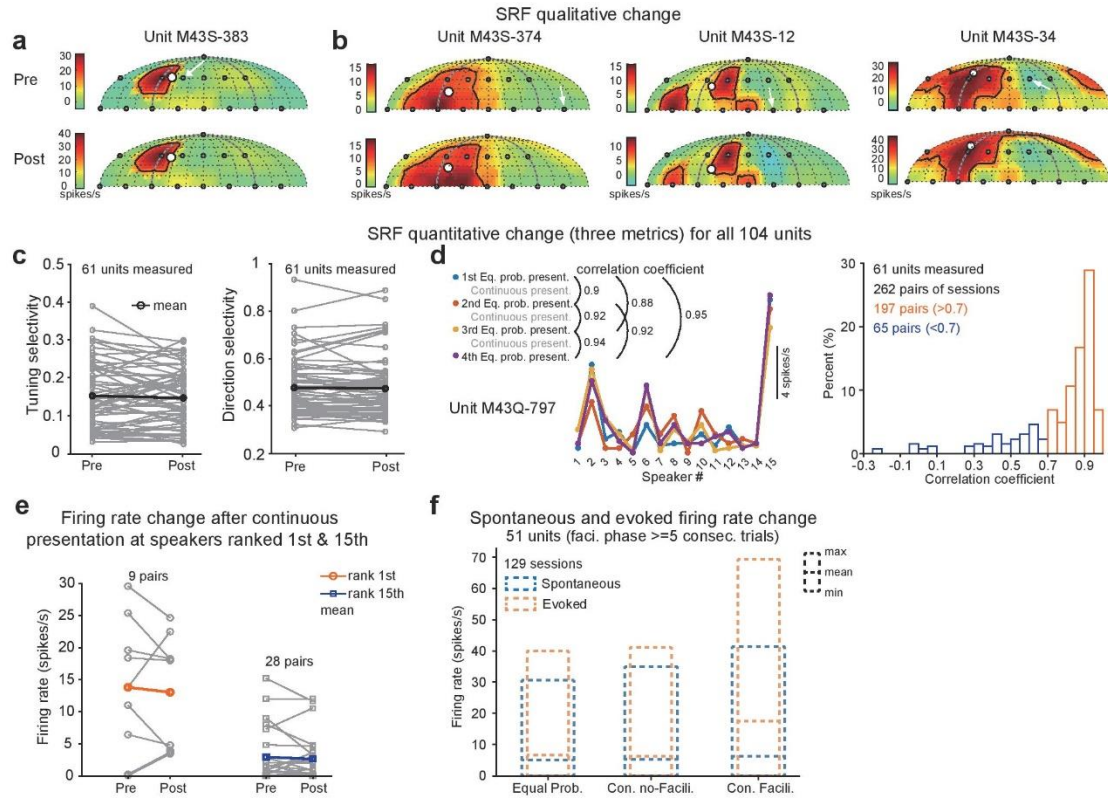

### Extended Data Fig. 6 Neural facilitation did not alter SRF

**a**, Spatial receptive field under the equal-probability presentation mode before (up) and after (down) the presentation of continuous sound stimuli (same neuron in **Fig. 1c**). White arrow indicates the speaker location tested under continuous presentation mode. Area within the enclosed black line is proportional to the reciprocal of tuning selectivity, and the size of white dot is proportional to the direction selectivity.

**b**, Similar to **a** but for all other three example neurons.

**c**, Tuning selectivity (left) and direction selectivity (right) before and after the continuous presentation mode.

**d**, Left, the pairwise correlation coefficient between each pair of responses to fifteen speaker locations in the example unit M43Q-797. Color dots and lines indicate averaged firing rate under equal-probability presentation modes. Right, histogram of the correlation coefficient before and after the continuous presentation mode. Orange bars indicate paired sessions with a correlation coefficient greater larger than 0.7.

**e**, Total firing rates (i.e., without minus the spontaneous firing rate) changes for the highest (1st, orange circles and line) and lowest (15th, blue circles and line) ranked target speakers (rank 1st:  $p = 0.7962$ , rank 15th:  $p = 0.9738$ , rank-sum test). Color dots indicate the mean value.

**f**, Spontaneous (blue dashed boxes) and evoked (orange dashed boxes) total firing rates of equal-probability presentation mode, non-facilitation, and facilitation phases of the continuous presentation mode. For equal-probability presentation mode, only trials using the target speaker were included.

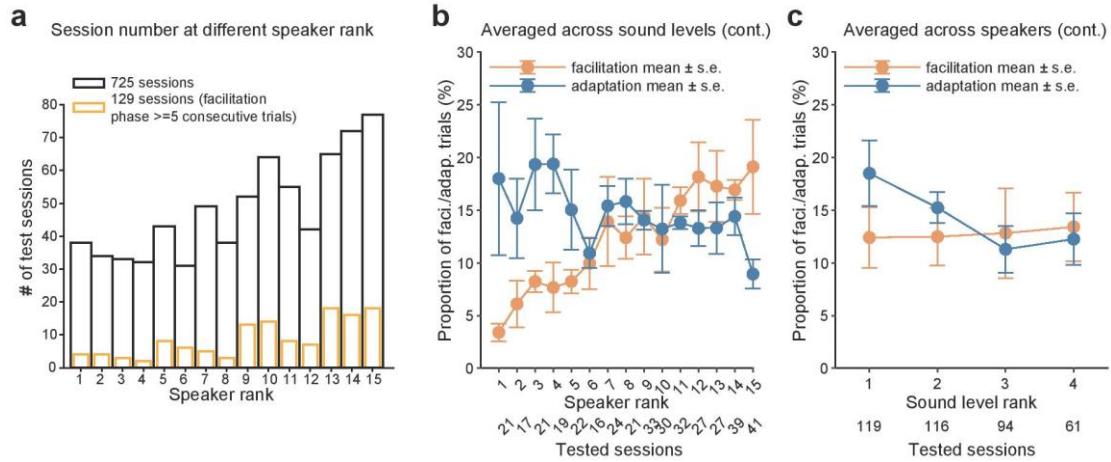

1  
2  
3  
4  
5  
6  
7  
8  
9  
10  
11  
12

**Extended Data Fig. 7 Proportion of facilitation and adaptation trials averaged across sound levels and speakers**

**a**, Number of all tested sessions (black bars) and sessions with facilitation phases lasting at least five consecutive trials (yellow bars) at different speaker rank.

**b**, Proportion of facilitation (orange dots and bars) and adaptation (blue dots and bars) trials averaged across sound levels under the continuous presentation mode. Dots and error bars indicate mean  $\pm$  standard deviation of mean.

**c**, Proportion of facilitation (orange dots and bars) and adaptation (blue dots and bars) trials averaged across speakers under the continuous presentation mode.

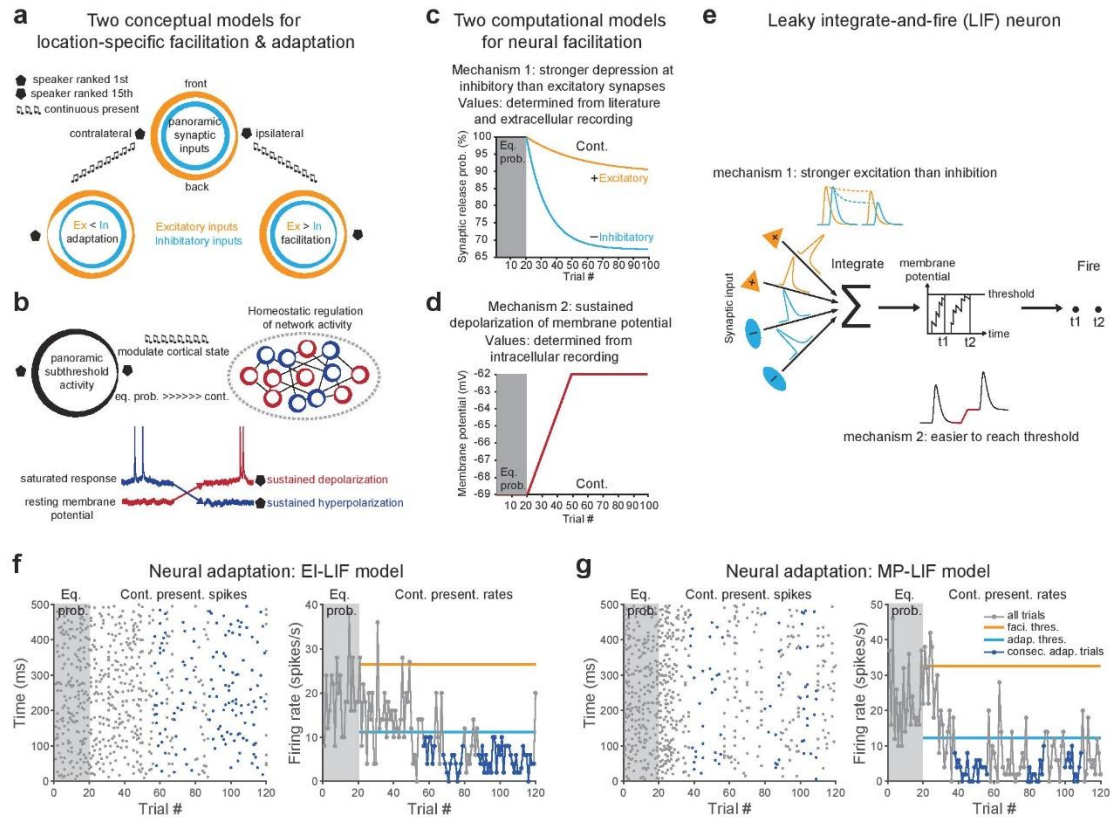

1

2

3 **Extended Data Fig. 8 Explanations of EI-LIF and MP-LIF models.**

4 **a**, A conceptual model for location-specific facilitation and adaptation. Orange and blue circles indicate excitatory and inhibitory synaptic inputs, respectively. The width of circles indicates the strength of synaptic inputs. Pentagon and upside-down pentagon shapes indicate 1st and 15th ranked speakers, respectively. Top, under equal-probability presentation mode, EI-LIF model neuron has a lower response at the ipsilateral location due to stronger inhibition (thick blue line) than excitation (thin orange line). Left, under continuous presentation mode, overall stronger inhibition than excitation would evoke neural adaptation at speaker ranked 1st (blue line is thicker than the orange line). Right, under continuous presentation mode, overall stronger excitation than inhibition would evoke neural facilitation at speaker ranked 15th (orange line is thicker than the blue line).

14 **b**, A conceptual model for location-specific sustained depolarization and hyperpolarization. Left, under equal-probability presentation mode, MP-LIF model neuron has panoramic subthreshold activity across all spatial locations but activity at the ipsilateral location is weakest (width of circle). Right, the neural activity of the network is homeostatically regulated: some neurons exhibit sustained depolarization (red circles) while others exhibit sustained hyperpolarization (blue circles). Black lines indicate the connections between two neurons. Bottom, under continuous presentation mode, sustained depolarization of weaker responses (red line) at the 15th-ranked speaker will be accompanied by sustained hyperpolarization of stronger responses (blue line) at the 1st-ranked speaker.

24 **c**, A computational model for location-specific facilitation. Gray shaded area (trial #1 to #20) indicates the equal-probability presentation mode. Under this presentation mode, no

1 adaptation occurred for both excitatory and inhibitory synaptic inputs, thus the synaptic  
2 release probability is 100% for both inputs. Under the continuous presentation mode (trial  
3 #21 to #100), the inhibitory synapses (blue line) have a stronger adaptation amplitude  
4 (i.e., lower synaptic release probability) than the excitatory synapses (orange line).

5 **d**, A computational model for location-specific sustained depolarization. Under the equal-  
6 probability presentation mode, the membrane potential is stable at -69mV. Under the  
7 continuous presentation mode, membrane potential reached a stable level of -62mV  
8 which was 7mV depolarized after 30 trials. Those three parameters were obtained from  
9 our intra-cellular recordings.

10 **e**, Leaky integrate-and-fire (LIF) neuron model. LIF neuron integrates multiple excitatory  
11 (orange lines) and inhibitory (blue lines) synaptic inputs and fires a spike ( $t_1$ ,  $t_2$ )  
12 whenever the membrane potential passes the threshold. Top, location-specific facilitation  
13 mechanism for the EI-LIF model neuron. Bottom, the other mechanism for the MP-LIF  
14 model neuron.

15 **f**, Neural adaptation simulated by EI-LIF model neuron. Left, spike raster plot of one  
16 session under equal-probability (shaded area) and continuous presentation mode. Blue  
17 dots indicate spikes belong to the long adaptation phase (i.e., at least five consecutive  
18 trials with firing rates lower than the adaptation threshold). Right, trial-by-trial firing rate  
19 from the same session. Blue dots and line indicate trails belong to the long adaptation  
20 phase. Thick orange and blue lines indicate the facilitation and adaptation thresholds,  
21 respectively.

22 **g**, Similar to **f** but for MP-LIF model neuron.

23



| Name                                                                                              | Symbol         | Source              | Value                         | Range          |
|---------------------------------------------------------------------------------------------------|----------------|---------------------|-------------------------------|----------------|
| <b>Leaky integrate-and-fire (LIF, equation 1)</b>                                                 |                |                     |                               |                |
| Time step                                                                                         | $\Delta t$     | This model          | 0.0001s                       | fixed          |
| Capacitance                                                                                       | $C$            | Wehr and Zador 2003 | $0.25 \cdot 10^{-9} \text{F}$ | fixed          |
| Excitatory reversal potential                                                                     | $E_e$          | Wehr and Zador 2003 | 0V                            | fixed          |
| Inhibitory reversal potential                                                                     | $E_i$          | Wehr and Zador 2003 | -0.085V                       | fixed          |
| Leak conductance                                                                                  | $g_{rest}$     | Wehr and Zador 2003 | $25 \cdot 10^{-9} \text{S}$   | fixed          |
| Resting potential                                                                                 | $E_{rest}$     | Experimental data   | -0.069V                       | fixed (EI-LIF) |
| Spontaneous noise scale                                                                           | $\sigma_s$     | This model          | 0.01V                         | fixed          |
| Gaussian noise                                                                                    | $\omega_n$     | This model          | [-1: 1]                       | random         |
| Threshold above resting potential                                                                 | $V_{th}$       | Wehr and Zador 2003 | 0.02V                         | fixed          |
| <b>Excitatory and inhibitory conductance (equations 2 and 3)</b>                                  |                |                     |                               |                |
| Excitatory synaptic release probability                                                           | $P_{rel_e}$    | This model          | 1                             | fixed (MP-LIF) |
| Inhibitory to excitatory ratio                                                                    | $r$            | This model          | 1                             | fixed          |
| Excitatory synaptic input number                                                                  | $N_e$          | Wehr and Zador 2003 | 10                            | fixed          |
| Alpha function time constant                                                                      | $\tau$         | Wehr and Zador 2003 | 0.005S                        | fixed          |
| Conductance noise scale                                                                           | $\sigma_c$     | This model          | $2.5 \cdot 10^{-8} \text{S}$  | fixed          |
| Inhibitory synaptic release probability                                                           | $P_{rel_i}$    | This model          | 1                             | fixed (MP-LIF) |
| Inhibitory synaptic input number                                                                  | $N_i$          | Wehr and Zador 2003 | 10                            | fixed          |
| Inhibitory to excitatory delay                                                                    | $d$            | This model          | 0S                            | fixed          |
| <b>Excitatory and inhibitory synaptic depression model (EI-LIF) (equations 4 and 5)</b>           |                |                     |                               |                |
| Excitatory synaptic depression amplitude                                                          | $A_e$          | This model          | 0.003                         | fixed          |
| Excitatory synaptic time constant                                                                 | $\tau_e$       | This model          | 20S                           | fixed          |
| Probability of target speaker                                                                     | $P_s$          | Experimental data   | 1/0.75/0.5<br>0.25/0.07       | fixed          |
| Inhibitory synaptic depression amplitude                                                          | $A_i$          | This model          | 0.025                         | fixed          |
| Inhibitory synaptic time constant                                                                 | $\tau_i$       | This model          | 10S                           | fixed          |
| Stimulus count                                                                                    | $N_{SC}$       | Experimental data   | 36                            | fixed          |
| Trial step                                                                                        | $T$            | This model          | 1                             | fixed          |
| Number of trials in random mode                                                                   | $T_r$          | This model          | 20                            | fixed          |
| Number of trials in continuous mode                                                               | $T_c$          | This model          | 300                           | fixed          |
| <b>Membrane potential depolarization and hyperpolarization model (MP-LIF) (equations 6 and 7)</b> |                |                     |                               |                |
| Dynamic resting membrane potential                                                                | $E_{rest\_MP}$ | Experimental data   | -0.062V<br>-0.076V            | max<br>min     |
| Membrane potential polarization value                                                             | $M$            | Experimental data   | $\pm 0.007 \text{V}$          | max, min       |
| Number of trials to stabilize                                                                     | $T_{th}$       | Experimental data   | 30                            | fixed          |
| Spike threshold scale                                                                             | $S$            | This model          | 0.3                           | fixed          |
| Stimulus count                                                                                    | $N_{SC}$       | Experimental data   | 30                            | fixed          |

1

2 **Extended Data Table. 1 Parameters and corresponding values used in**

3 **EI-LIF and MP-LIF model neurons.**

4
